# Supplementary material
Source: PubMed Central journal article supplement (PMC7666431)

## Supplemental Online Content

Lam CSP, Giczevska A, Sliwa K, et al; for the VICTORIA Study Group. Clinical outcomes and response to vericiguat according to index heart failure event: insights from the VICTORIA trial. *JAMA Cardiol*. Published online November 13, 2020. doi:10.1001/jamacardio.2020.6455

**eTable 1.** Candidate variable list

**eTable 2.** Hazard ratios for primary and secondary endpoints by index admission subgroups

**eTable 3.** Treatment effect by index admission event subgroup

**eTable 4.** Safety events of interest and serious adverse events by index event group

**eFigure 1.** Kaplan-Meier analysis

**eFigure 2.** Treatment effect of vericiguat compared with placebo analyzed using time from intravenous diuretic administration for outpatient worsening as a continuous variable

This supplemental material has been provided by the authors to give readers additional information about their work.

**eTable 1.** Candidate variable list

| <b>Category</b>         | <b>Variables Included</b>                                                                                                                                                                                                                                                                |
|-------------------------|------------------------------------------------------------------------------------------------------------------------------------------------------------------------------------------------------------------------------------------------------------------------------------------|
| Trial details           | Randomized treatment, subject randomized while hospitalized,                                                                                                                                                                                                                             |
| Demographic details     | Age, sex, region/race (incorporation of race for NA), ethnicity                                                                                                                                                                                                                          |
| HF details              | Index event, time from index event to randomization, duration of HF diagnosis, duration of primary diagnosis of HFrEF, ejection fraction, NYHA class                                                                                                                                     |
| Past medical history    | CCSA class, atrial fibrillation, atrial flutter, COPD, angina, diabetes, hypertension, hyperlipidemia, anemia, sleep apnea, peripheral artery disease, prior MI, prior stroke, prior TIA, prior CABG, prior PCI, aortic valve replacement, mitral valve replacement, current tobacco use |
| Physical exam/vitals    | BMI, height, weight, systolic blood pressure, diastolic blood pressure, pulse pressure                                                                                                                                                                                                   |
| Medications and devices | ACE or ARB, beta blocker, MRA, sacubitril-valsartan, ivabradine, ICD, pacemaker                                                                                                                                                                                                          |
| Laboratories            | Creatinine, eGFR, NT-proBNP, hemoglobin, potassium, sodium, albumin, ALT, AST, bicarbonate, bilirubin, BUN, calcium, chloride, GGT, glucose, hematocrit, platelets, white blood count, red blood count, urate                                                                            |
| ECG                     | QTcF                                                                                                                                                                                                                                                                                     |

ACE indicates angiotensin converting enzyme; ALT, alanine transaminase; ARB, angiotensin receptor blocker; AST, aspartate aminotransferase; BMI, body mass index; BUN, blood urea nitrogen; CABG, coronary artery bypass grafting; CCSA, Canadian

Cardiovascular Society Angina Score; COPD, chronic obstructive pulmonary disease; eGFR, estimated glomerular filtration rate; GGT, gamma-glutamyl transferase; HF, heart failure; HFrEF, heart failure with reduced ejection fraction; ICD, implantable cardioverter defibrillator; MI, myocardial infarction; MRA, mineralocorticoid-receptor antagonists; NA, North America; NT-proBNP, N-terminal pro-brain natriuretic peptide; NYHA, New York Heart Association; PCI, percutaneous coronary intervention; QTcF, corrected QT interval by Fredericia; TIA, transient ischemic attack.

**eTable 2. Hazard ratios for primary and secondary endpoints by index admission subgroups**

| Endpoint                    | Model Type              | Index Group*                       | HR (95% CI)         | P-value |
|-----------------------------|-------------------------|------------------------------------|---------------------|---------|
| <b>Primary Endpoints</b>    |                         |                                    |                     |         |
| HF hospitalization/CV death | Unadjusted              | HF Hospitalization within 3 Months | 1.690 (1.464–1.951) | <.0001  |
|                             | Multivariable-adjusted† | HF Hospitalization within 3 Months | 1.482 (1.272–1.728) | <.0001  |
|                             |                         |                                    |                     |         |
|                             | Unadjusted              | HF Hospitalization 3-6 Months      | 1.260 (1.057–1.502) | 0.0100  |
|                             | Multivariable-adjusted† | HF Hospitalization 3-6 Months      | 1.115 (0.925–1.344) | 0.2539  |
| <b>Secondary Endpoints</b>  |                         |                                    |                     |         |
| CV death                    | Unadjusted              | HF Hospitalization within 3 Months | 1.394 (1.137–1.710) | 0.0014  |
|                             | Multivariable-adjusted† | HF Hospitalization within 3 Months | 1.150 (0.921–1.438) | 0.2173  |
|                             |                         |                                    |                     |         |
|                             | Unadjusted              | HF Hospitalization 3-6 Months      | 1.199 (0.934–1.538) | 0.1541  |
|                             | Multivariable-adjusted† | HF Hospitalization 3-6 Months      | 1.168 (0.892–1.530) | 0.2577  |
|                             |                         |                                    |                     |         |
| HF hospitalization          | Unadjusted              | HF Hospitalization within 3 Months | 1.772 (1.501–2.093) | <.0001  |
|                             | Multivariable-adjusted† | HF Hospitalization within 3 Months | 1.573 (1.319–1.876) | <.0001  |

|                                       |                             |                                       |                         |        |
|---------------------------------------|-----------------------------|---------------------------------------|-------------------------|--------|
|                                       |                             |                                       |                         |        |
|                                       | Unadjusted                  | HF Hospitalization 3-6<br>Months      | 1.259 (1.027–<br>1.545) | 0.0270 |
|                                       | Multivariable-<br>adjusted† | HF Hospitalization 3-6<br>Months      | 1.092 (0.878–<br>1.358) | 0.4281 |
|                                       |                             |                                       |                         |        |
| All-cause death/HF<br>hospitalization | Unadjusted                  | HF Hospitalization within 3<br>Months | 1.687 (1.467–<br>1.939) | <.0001 |
|                                       | Multivariable-<br>adjusted† | HF Hospitalization within 3<br>Months | 1.457 (1.256–<br>1.691) | <.0001 |
|                                       |                             |                                       |                         |        |
|                                       | Unadjusted                  | HF Hospitalization 3-6<br>Months      | 1.311 (1.107–<br>1.553) | 0.0017 |
|                                       | Multivariable-<br>adjusted† | HF Hospitalization 3-6<br>Months      | 1.168 (0.976–<br>1.399) | 0.0908 |
|                                       |                             |                                       |                         |        |
| All-cause death                       | Unadjusted                  | HF Hospitalization within 3<br>Months | 1.463 (1.212–<br>1.766) | <.0001 |
|                                       | Multivariable-<br>adjusted† | HF Hospitalization within 3<br>Months | 1.234 (1.004–<br>1.516) | 0.0456 |
|                                       |                             |                                       |                         |        |
|                                       | Unadjusted                  | HF Hospitalization 3-6<br>Months      | 1.309 (1.044–<br>1.642) | 0.0197 |
|                                       | Multivariable-<br>adjusted† | HF Hospitalization 3-6<br>Months      | 1.280 (1.004–<br>1.632) | 0.0466 |

\*Outpatient worsening group (receiving IV diuretic for HF within 3 months, without hospitalization within 6 months) index group used as reference group.

†Variables included in multivariable adjustment included HF characteristics (longer HF duration, and worse NYHA class); history of peripheral arterial disease (PAD), myocardial infarction (MI); patients baseline characteristics (age, systolic blood pressure, race and region, Anemia and non-use of Beta-Blockers); and laboratory parameters (N-terminal pro-B-type natriuretic peptide [NT-proBNP], hemoglobin, sodium, bilirubin, urate, chloride and albumin).

CI indicates confidence interval; CV, cardiovascular; HF, heart failure; HR, hazard ratio.

eTable 3. Treatment effect by index admission event subgroup

| Event                      | Index group                          | Vericiguat  |               | Placebo     |               | Unadjusted Model    |         |                     | Multivariable Adjusted Model† |         |                     |
|----------------------------|--------------------------------------|-------------|---------------|-------------|---------------|---------------------|---------|---------------------|-------------------------------|---------|---------------------|
|                            |                                      | No. (%)     | Event Rate s* | No. (%)     | Event Rate s* | HR (95% CI)         | P-value | Interaction P-value | HR (95% CI)                   | P-value | Interaction P-value |
| <b>Primary endpoint</b>    |                                      |             |               |             |               |                     |         |                     |                               |         |                     |
| HF hosp/CV death           | HF Hospitalization within 3 Months   | 660 (39.45) | 39.29         | 701 (41.11) | 42.46         | 0.931 (0.837–1.035) | 0.1872  | 0.4333              | 0.935 (0.836–1.046)           | 0.2416  | 0.2066              |
| HF hosp/CV death           | HF Hospitalization 3-6 Months        | 141 (31.06) | 27.12         | 151 (36.21) | 32.39         | 0.848 (0.674–1.066) | 0.1578  |                     | 0.915 (0.716–1.170)           | 0.4800  |                     |
| HF hosp/CV death           | Outpatient worsening within 3 Months | 96 (24.06)  | 20.46         | 120 (29.85) | 26.39         | 0.784 (0.599–1.025) | 0.0751  |                     | 0.710 (0.535–0.942)           | 0.0177  |                     |
| <b>Secondary endpoints</b> |                                      |             |               |             |               |                     |         |                     |                               |         |                     |
| CV death                   | HF Hospitalization within 3 Months   | 303 (18.11) | 14.57         | 300 (17.60) | 14.39         | 1.013 (0.864–1.189) | 0.8717  | 0.1433              | 0.981 (0.829–1.160)           | 0.8213  | 0.3716              |
| CV death                   | HF Hospitalization 3-6 Months        | 65 (14.32)  | 10.85         | 78 (18.71)  | 14.10         | 0.771 (0.555–1.072) | 0.1222  |                     | 0.822 (0.577–1.171)           | 0.2768  |                     |
| CV death                   | Outpatient worsening within 3 Months | 46 (11.53)  | 8.72          | 63 (15.67)  | 11.96         | 0.731 (0.500–1.069) | 0.1064  |                     | 0.744 (0.495–1.120)           | 0.1565  |                     |
|                            |                                      |             |               |             |               |                     |         |                     |                               |         |                     |

|                         |                                      |                |       |                |       |                        |        |        |                        |        |        |
|-------------------------|--------------------------------------|----------------|-------|----------------|-------|------------------------|--------|--------|------------------------|--------|--------|
| HF hosp                 | HF Hospitalization within 3 Months   | 518<br>(30.96) | 30.83 | 544<br>(31.91) | 32.99 | 0.941<br>(0.835–1.062) | 0.3249 | 0.2926 | 0.950<br>(0.836–1.079) | 0.4297 | 0.0955 |
| HF hosp                 | HF Hospitalization 3-6 Months        | 105<br>(23.13) | 20.25 | 111<br>(26.62) | 23.81 | 0.863<br>(0.661–1.126) | 0.2776 |        | 0.888<br>(0.664–1.186) | 0.4205 |        |
| HF hosp                 | Outpatient worsening within 3 Months | 68<br>(17.04)  | 14.49 | 92<br>(22.89)  | 20.24 | 0.725<br>(0.530–0.992) | 0.0443 |        | 0.644<br>(0.464–0.894) | 0.0085 |        |
|                         |                                      |                |       |                |       |                        |        |        |                        |        |        |
| All-cause death/HF hosp | HF Hospitalization within 3 Months   | 700<br>(41.84) | 41.67 | 738<br>(43.28) | 44.70 | 0.938<br>(0.846–1.040) | 0.2223 | 0.3712 | 0.928<br>(0.831–1.035) | 0.1781 | 0.3040 |
| All-cause death/HF hosp | HF Hospitalization 3-6 Months        | 155<br>(34.14) | 29.82 | 167<br>(40.05) | 35.82 | 0.842<br>(0.677–1.048) | 0.1232 |        | 0.913<br>(0.722–1.154) | 0.4454 |        |
| All-cause death/HF hosp | Outpatient worsening within 3 Months | 102<br>(25.56) | 21.74 | 127<br>(31.59) | 27.93 | 0.786<br>(0.606–1.021) | 0.0708 |        | 0.736<br>(0.559–0.968) | 0.0283 |        |
|                         |                                      |                |       |                |       |                        |        |        |                        |        |        |
| All-cause death         | HF Hospitalization within 3 Months   | 374<br>(22.36) | 17.98 | 363<br>(21.29) | 17.41 | 1.034<br>(0.895–1.194) | 0.6543 | 0.0996 | 1.007<br>(0.865–1.173) | 0.9249 | 0.2770 |
| All-cause death         | HF Hospitalization 3-6 Months        | 83<br>(18.28)  | 13.85 | 99<br>(23.74)  | 17.89 | 0.776<br>(0.580–1.039) | 0.0882 |        | 0.839<br>(0.614–1.147) | 0.2721 | .      |
| All-cause death         | Outpatient worsening within 3 Months | 55<br>(13.78)  | 10.43 | 72<br>(17.91)  | 13.67 | 0.765<br>(0.539–1.087) | 0.1357 |        | 0.758<br>(0.522–1.101) | 0.1451 | .      |

\*Event rates/100 patient-yrs.

†Variables included in multivariable adjustment included HF characteristics (longer HF duration, and worse NYHA class); history of peripheral arterial disease (PAD), myocardial infarction (MI); patients baseline characteristics (age, systolic blood



pressure, race and region, Anemia and non-use of Beta-Blockers); and laboratory parameters (N-terminal pro-B-type natriuretic peptide [NT-proBNP], hemoglobin, sodium, bilirubin, urate, chloride and albumin).

CI indicates confidence interval; CV, cardiovascular; HF, heart failure; HR, hazard ratio; IV, intravenous.

**eTable 4. Safety events of interest and serious adverse events by index event group**

|                         |                                                     | Vericiguat |          | Placebo |          | Difference in % vs Placebo |         |
|-------------------------|-----------------------------------------------------|------------|----------|---------|----------|----------------------------|---------|
| Safety events           | Index group                                         | n          | (%)      | n       | (%)      | Estimate (95% CI)*         | P-value |
| Symptomatic Hypotension | Randomized while hospitalized (any hospitalization) | 24         | (8.136)  | 17      | (6.159)  | 2.0 (-2.2 to 6.2)          | 0.361   |
|                         | ≤30 days                                            | 72         | (10.315) | 64      | (8.388)  | 1.9 (-1.1 to 4.9)          | 0.205   |
|                         | 30-90 days                                          | 58         | (8.517)  | 49      | (7.402)  | 1.1 (-1.8 to 4.0)          | 0.451   |
|                         | >90 days                                            | 38         | (8.539)  | 39      | (9.443)  | -0.9 (-4.7 to 2.9)         | 0.644   |
|                         | Outpatient worsening                                | 34         | (8.521)  | 28      | (6.965)  | 1.6 (-2.1 to 5.3)          | 0.410   |
| Syncope                 | Randomized while hospitalized (any hospitalization) | 17         | (5.763)  | 11      | (3.986)  | 1.8 (-1.7 to 5.3)          | 0.326   |
|                         | ≤30 days                                            | 20         | (2.865)  | 27      | (3.539)  | -0.7 (-2.5 to 1.1)         | 0.466   |
|                         | 30-90 days                                          | 27         | (3.965)  | 21      | (3.172)  | 0.8 (-1.2 to 2.8)          | 0.434   |
|                         | >90 days                                            | 20         | (4.494)  | 15      | (3.632)  | 0.9 (-1.8 to 3.5)          | 0.523   |
|                         | Outpatient worsening                                | 17         | (4.261)  | 13      | (3.234)  | 1.0 (-1.6 to 3.7)          | 0.444   |
| Serious adverse events  | Randomized while hospitalized (any hospitalization) | 123        | (41.695) | 114     | (41.304) | 0.4 (-7.7 to 8.5)          | 0.925   |
|                         | ≤30 days                                            | 228        | (32.665) | 254     | (33.290) | -0.6 (-5.5 to 4.2)         | 0.800   |
|                         | 30-90 days                                          | 204        | (29.956) | 242     | (36.556) | -6.6 (-11.6 to -1.6)       | 0.010   |
|                         | >90 days                                            | 146        | (32.809) | 149     | (36.077) | -3.3 (-9.6 to 3.1)         | 0.314   |
|                         | Outpatient worsening                                | 122        | (30.576) | 114     | (28.358) | 2.2 (-4.1 to 8.5)          | 0.491   |

Based on the Miettinen & Nurminen method.

CI indicates confidence interval; IV, intravenous.

**eFigure 1. Kaplan-Meier graphs by index event subgroup showing time to first primary composite endpoint (A), time to heart failure (HF) hospitalization (B) and time to cardiovascular death (C).**

Red lines represent patients randomized within 3 months of HF hospitalization, blue lines those randomized within 3-6 months of HF hospitalization, and green lines those randomized within 3 months of outpatient worsening without HF hospitalization.

**eFigure 1A. Kaplan-Meier analysis for time to first primary composite endpoint by index event subgroup**

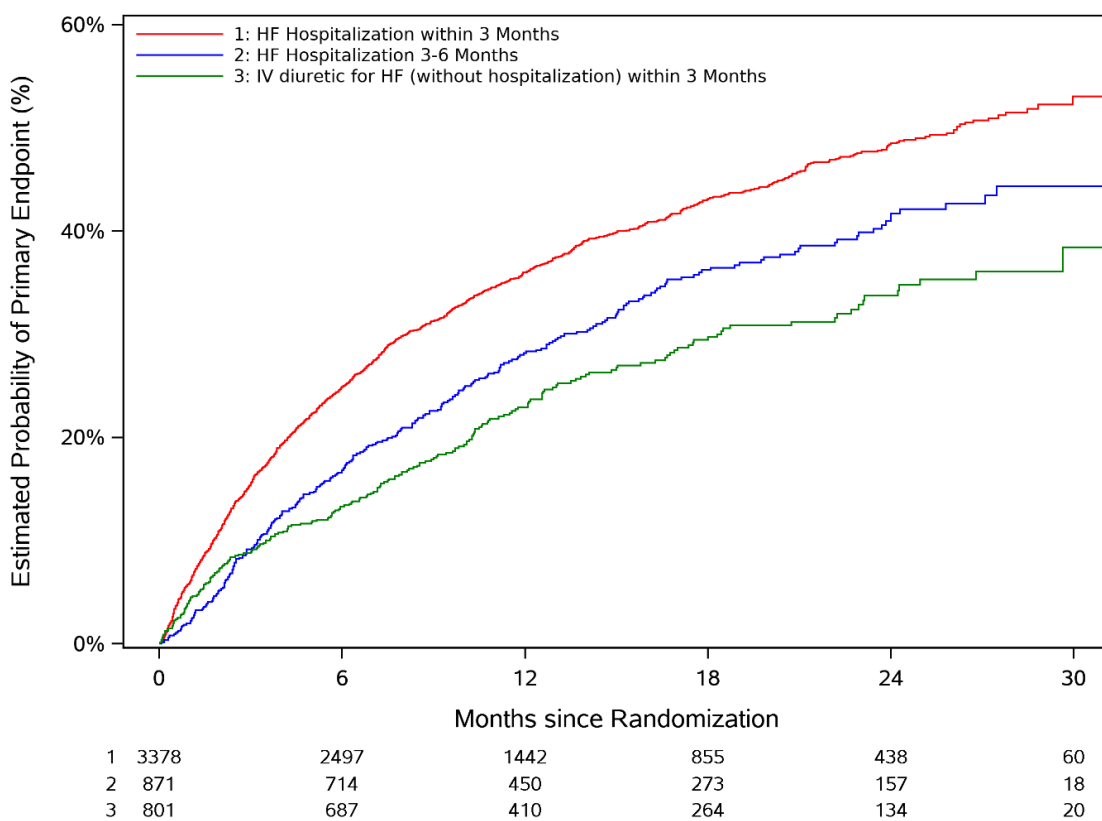

**eFigure 1B.** Kaplan-Meier analysis for time to heart failure hospitalization by index event subgroup

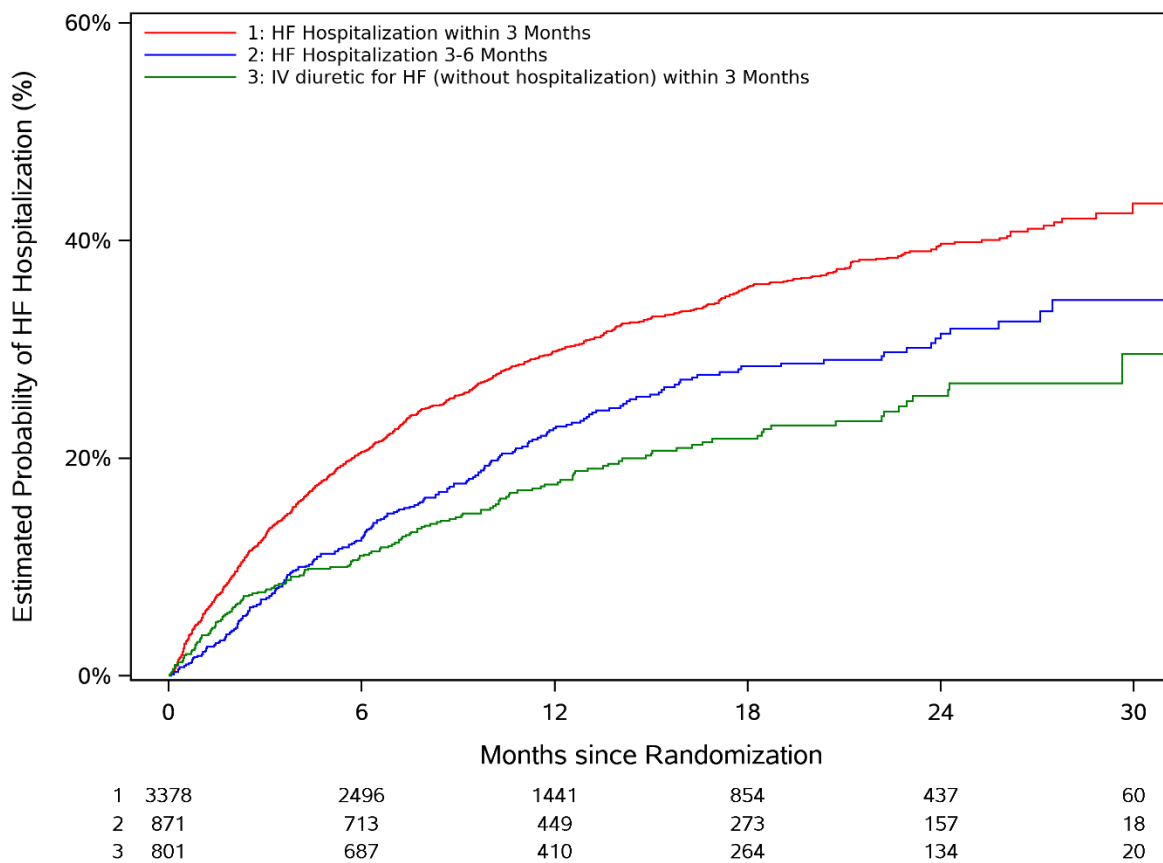

**eFigure 1C.** Kaplan-Meier analysis for time to cardiovascular death by index event subgroup

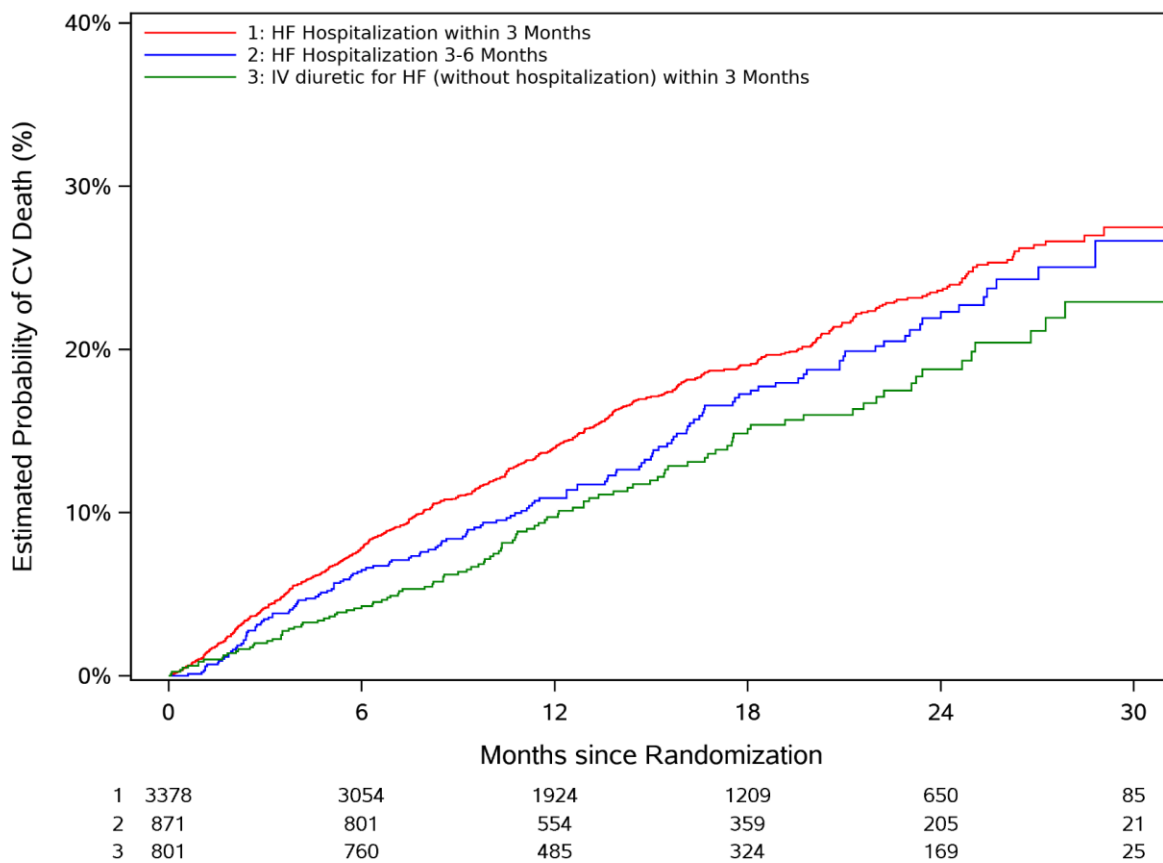

**eFigure 2. Treatment effect of vericiguat compared with placebo analyzed using time from intravenous diuretic administration for outpatient worsening as a continuous variable.**

The treatment effect of vericiguat (hazard ratio with 95% confidence interval) is shown as a function of time as a continuous variable from index event to randomization among patients receiving intravenous diuretics for outpatient worsening HF.

Note: Data represents a figure up to 60 days. Model was populated for 769 patients with a follow-up to 180 days (32 patients excluded due to missing data).

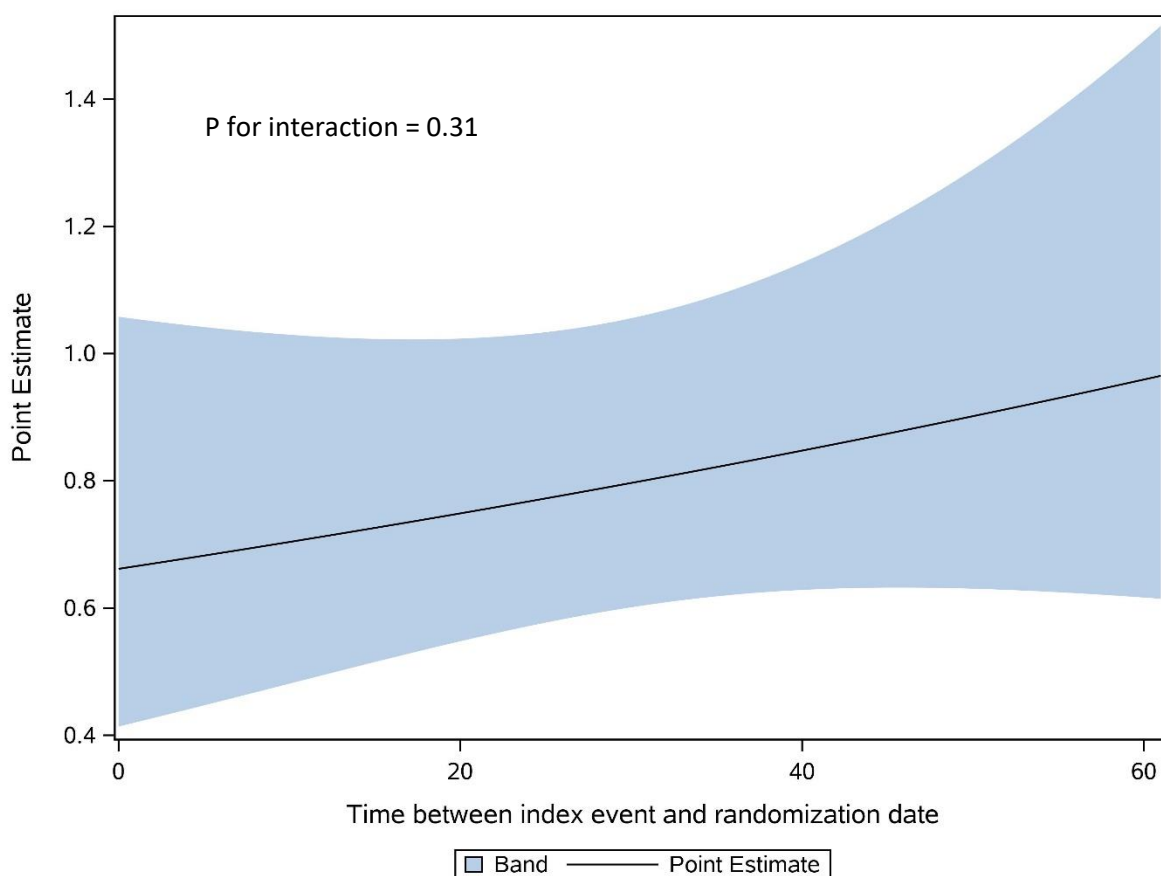

Supplement: jamacardiol-e206455-s001.pdf [file jamacardiol-e206455-s001.pdf]
