# Supplementary material
Source: PubMed Central journal article supplement (PMC7666431)
Supplement: jamacardiol-e206455-s002.pdf [file jamacardiol-e206455-s002.pdf]

Supplemental Online Content: Nonauthor Collaborators

\*Indicates required information. Only first name, last name, and suffix will appear in PubMed.

| <b>Group Name:* The VICTORIA Study Group</b> |                  |         |                  |             |                                          |                                                         |                                  |
|----------------------------------------------|------------------|---------|------------------|-------------|------------------------------------------|---------------------------------------------------------|----------------------------------|
| First Name and Middle Initial(s)*            | Last Name*       | Suffix* | Academic Degrees | Institution | Location (city, state/province, country) | Role or Contribution, eg, chair, principal investigator | Subgroup, eg, Steering Committee |
| Eduardo Roque                                | Perna            |         |                  |             |                                          |                                                         |                                  |
| Maria                                        | Galarza Salazan  |         |                  |             |                                          |                                                         |                                  |
| Ignacio                                      | MacKinnon        |         |                  |             |                                          |                                                         |                                  |
| Florencia                                    | Eden             |         |                  |             |                                          |                                                         |                                  |
| Luis                                         | Cartasegna       |         |                  |             |                                          |                                                         |                                  |
| Viviana                                      | Novas            |         |                  |             |                                          |                                                         |                                  |
| Hugo A.                                      | Luquez           |         |                  |             |                                          |                                                         |                                  |
| Ana                                          | Cenci            |         |                  |             |                                          |                                                         |                                  |
| Miguel Angel                                 | Hominal          |         |                  |             |                                          |                                                         |                                  |
| Maria Veronica                               | Bianchini        |         |                  |             |                                          |                                                         |                                  |
| Rodolfo Andres Ahuad                         | Guerrero         |         |                  |             |                                          |                                                         |                                  |
| Andrea                                       | Alvarez D'Amelio |         |                  |             |                                          |                                                         |                                  |
| Carlos Alberto                               | Poy              |         |                  |             |                                          |                                                         |                                  |
| Maria                                        | Poy              |         |                  |             |                                          |                                                         |                                  |
| Claudio R.                                   | Majul            |         |                  |             |                                          |                                                         |                                  |
| Cecilia                                      | Currao           |         |                  |             |                                          |                                                         |                                  |
| Ezequiel Hector                              | Vottero          |         |                  |             |                                          |                                                         |                                  |
| Mariana                                      | Perrin           |         |                  |             |                                          |                                                         |                                  |
| Cesar Javier                                 | Zaidman          |         |                  |             |                                          |                                                         |                                  |
| Vanesa                                       | Espinosa         |         |                  |             |                                          |                                                         |                                  |
| Gerardo                                      | Zapata           |         |                  |             |                                          |                                                         |                                  |
| Luciana                                      | Arias            |         |                  |             |                                          |                                                         |                                  |
| Sonia Angelica                               | Sassone          |         |                  |             |                                          |                                                         |                                  |
| Lucas                                        | Tonelli          |         |                  |             |                                          |                                                         |                                  |
| Daniel Agustin Chirino                       | Navarta          |         |                  |             |                                          |                                                         |                                  |
| Maria                                        | Mangini          |         |                  |             |                                          |                                                         |                                  |
| Jesus                                        | Cuadrado         |         |                  |             |                                          |                                                         |                                  |
| Paula                                        | Bordoni          |         |                  |             |                                          |                                                         |                                  |
| David                                        | Kaye             |         |                  |             |                                          |                                                         |                                  |

Supplemental Online Content: Nonauthor Collaborators

\*Indicates required information. Only first name, last name, and suffix will appear in PubMed.

|                |                        |  |  |  |  |  |  |
|----------------|------------------------|--|--|--|--|--|--|
| Kaye           | Carter                 |  |  |  |  |  |  |
| John           | Amerena                |  |  |  |  |  |  |
| Toni           | Shanahan               |  |  |  |  |  |  |
| Scott          | McKenzie               |  |  |  |  |  |  |
| Kathryn        | Stibijl                |  |  |  |  |  |  |
| Carmine        | De Pasquale            |  |  |  |  |  |  |
| Fiona          | Wollaston              |  |  |  |  |  |  |
| David Martin   | Colquhoun              |  |  |  |  |  |  |
| Antonio        | Ferreira-Jardim        |  |  |  |  |  |  |
| Alicia         | Chan                   |  |  |  |  |  |  |
| Greer          | Dymmott                |  |  |  |  |  |  |
| Brendan        | McQuillan              |  |  |  |  |  |  |
| Katayun        | Mohammadi              |  |  |  |  |  |  |
| David          | Cross                  |  |  |  |  |  |  |
| Judy           | Jeffrey                |  |  |  |  |  |  |
| Andrew         | Sindone                |  |  |  |  |  |  |
| Magdalena      | Gebran                 |  |  |  |  |  |  |
| Amit           | Shah                   |  |  |  |  |  |  |
| Gill           | Tulloch                |  |  |  |  |  |  |
| Maged          | William                |  |  |  |  |  |  |
| Bets           | Conway                 |  |  |  |  |  |  |
| James          | Wong                   |  |  |  |  |  |  |
| Donna          | North                  |  |  |  |  |  |  |
| Dirk           | von Lewinski           |  |  |  |  |  |  |
| Karin          | Brandner               |  |  |  |  |  |  |
| Uta            | Hoppe                  |  |  |  |  |  |  |
| Kristen        | Kopp                   |  |  |  |  |  |  |
| Regina         | Steringer Mascherbauer |  |  |  |  |  |  |
| Claudia        | Steinkellner           |  |  |  |  |  |  |
| Diana          | Bonderman              |  |  |  |  |  |  |
| Christina      | Binder                 |  |  |  |  |  |  |
| Christopher    | Aldbrecht              |  |  |  |  |  |  |
| Maria          | Leitgeb                |  |  |  |  |  |  |
| Anne-Catherine | Pouleur                |  |  |  |  |  |  |

Supplemental Online Content: Nonauthor Collaborators

\*Indicates required information. Only first name, last name, and suffix will appear in PubMed.

|                |                |  |  |  |  |  |  |
|----------------|----------------|--|--|--|--|--|--|
| Florence       | Sinnaeve       |  |  |  |  |  |  |
| Matthias       | Dupont         |  |  |  |  |  |  |
| Carola         | Claes          |  |  |  |  |  |  |
| Michel         | De Ceuninck    |  |  |  |  |  |  |
| Els            | Vancayseele    |  |  |  |  |  |  |
| Philippe       | Timmermans     |  |  |  |  |  |  |
| Gregory        | Van Genechten  |  |  |  |  |  |  |
| Pierre         | Troisfontaines |  |  |  |  |  |  |
| Mireille       | Massoz         |  |  |  |  |  |  |
| Thao Thanh     | Huynh          |  |  |  |  |  |  |
| Caroline       | Boudreault     |  |  |  |  |  |  |
| Eric           | Sabbah         |  |  |  |  |  |  |
| Isabelle       | Chausse        |  |  |  |  |  |  |
| Ronald Leonard | Bourgeois      |  |  |  |  |  |  |
| Karen          | Boyd           |  |  |  |  |  |  |
| Michael        | Heffernan      |  |  |  |  |  |  |
| Marie          | Birch          |  |  |  |  |  |  |
| Marie-Claude   | Parent         |  |  |  |  |  |  |
| Helene         | Brown          |  |  |  |  |  |  |
| A. Shekhar     | Pandey         |  |  |  |  |  |  |
| Tatiana        | Ballivian      |  |  |  |  |  |  |
| Nadia          | Giannetti      |  |  |  |  |  |  |
| Reza           | Sahebjamei     |  |  |  |  |  |  |
| Saul           | Vizel          |  |  |  |  |  |  |
| Beverley       | Fox            |  |  |  |  |  |  |
| Dennis Wayne   | Rupka          |  |  |  |  |  |  |
| Sandi          | Thiessen       |  |  |  |  |  |  |
| Christian      | Constance      |  |  |  |  |  |  |
| Marie-France   | Gauthier       |  |  |  |  |  |  |
| Justin         | Ezekowitz      |  |  |  |  |  |  |
| Quentin        | Kushnerik      |  |  |  |  |  |  |
| Allan          | Schaffer       |  |  |  |  |  |  |
| Wendy          | Janz           |  |  |  |  |  |  |
| Michael        | Chan           |  |  |  |  |  |  |

Supplemental Online Content: Nonauthor Collaborators

\*Indicates required information. Only first name, last name, and suffix will appear in PubMed.

|                 |              |  |  |  |  |  |  |
|-----------------|--------------|--|--|--|--|--|--|
| Jennifer        | Knight       |  |  |  |  |  |  |
| Serge           | Lepage       |  |  |  |  |  |  |
| Daniel          | Soucy        |  |  |  |  |  |  |
| John D.         | Parker       |  |  |  |  |  |  |
| Elaine          | Hsu          |  |  |  |  |  |  |
| Lisa            | Mielniczuk   |  |  |  |  |  |  |
| Ermina          | Moga         |  |  |  |  |  |  |
| Benoit          | Coutu        |  |  |  |  |  |  |
| Julie           | Fleury       |  |  |  |  |  |  |
| Paul            | MacDonald    |  |  |  |  |  |  |
| Kathleen        | Hines        |  |  |  |  |  |  |
| Diego           | Delgado      |  |  |  |  |  |  |
| Natalia         | Nugaeva      |  |  |  |  |  |  |
| Ying            | Sia          |  |  |  |  |  |  |
| Isabelle        | Roy          |  |  |  |  |  |  |
| David           | Laflamme     |  |  |  |  |  |  |
| Christel        | Simard       |  |  |  |  |  |  |
| Gilbert         | Gosselin     |  |  |  |  |  |  |
| Katia           | Drouin       |  |  |  |  |  |  |
| Brian           | Clarke       |  |  |  |  |  |  |
| Kimberley       | Ronak        |  |  |  |  |  |  |
| Denis           | Saulnier     |  |  |  |  |  |  |
| Melissa         | Cote         |  |  |  |  |  |  |
| Bruce Alexander | Sussex       |  |  |  |  |  |  |
| Bernadette      | Druken       |  |  |  |  |  |  |
| Miroslaw        | Rajda        |  |  |  |  |  |  |
| Jayne           | Falkenham    |  |  |  |  |  |  |
| Ashok           | Mukherjee    |  |  |  |  |  |  |
| Beverly         | Bozek        |  |  |  |  |  |  |
| Gordon Willy    | Pak Ling Moe |  |  |  |  |  |  |
| Carlos          | Fernando     |  |  |  |  |  |  |
| Sebastien       | Bergeron     |  |  |  |  |  |  |
| Hugo            | Tremblay     |  |  |  |  |  |  |
| Marcelo Coelho  | Shibata      |  |  |  |  |  |  |

Supplemental Online Content: Nonauthor Collaborators

\*Indicates required information. Only first name, last name, and suffix will appear in PubMed.

|                    |                 |  |  |  |  |  |  |
|--------------------|-----------------|--|--|--|--|--|--|
| Bonnie             | Woloschuk       |  |  |  |  |  |  |
| Dante              | Manyari         |  |  |  |  |  |  |
| Tracy              | Cleveland       |  |  |  |  |  |  |
| Frank              | Nigro           |  |  |  |  |  |  |
| Crystal            | Forsyth         |  |  |  |  |  |  |
| Annie              | Roy             |  |  |  |  |  |  |
| Helene             | Bolduc          |  |  |  |  |  |  |
| Danielle           | Dion            |  |  |  |  |  |  |
| Nancy              | Gilbert         |  |  |  |  |  |  |
| James Y.           | Cha             |  |  |  |  |  |  |
| Judy               | Otis            |  |  |  |  |  |  |
| Melinda            | Barabas         |  |  |  |  |  |  |
| Marie-Josee        | Chartrand       |  |  |  |  |  |  |
| Victor             | Assef           |  |  |  |  |  |  |
| Andrea             | Eikhof          |  |  |  |  |  |  |
| Manuela            | Novajas Balboa  |  |  |  |  |  |  |
| Carla Belen        | Aravena Vasquez |  |  |  |  |  |  |
| Juan Carlos Prieto | Dominguez       |  |  |  |  |  |  |
| Viviana            | Noriega         |  |  |  |  |  |  |
| Patricio           | Yovaniniz       |  |  |  |  |  |  |
| Marcela            | Grandon         |  |  |  |  |  |  |
| Fernando           | Lanas           |  |  |  |  |  |  |
| Jessica            | Hidalgo         |  |  |  |  |  |  |
| Yuhui              | Zhang           |  |  |  |  |  |  |
| Jing               | Dong            |  |  |  |  |  |  |
| Haiying            | Dai             |  |  |  |  |  |  |
| Ying               | Xiao            |  |  |  |  |  |  |
| Tingbo             | Jiang           |  |  |  |  |  |  |
| Lin                | Shi             |  |  |  |  |  |  |
| Jiyan              | Chen            |  |  |  |  |  |  |
| Peiyu              | He              |  |  |  |  |  |  |
| Daoquan            | Peng            |  |  |  |  |  |  |
| Fangmei            | Qing            |  |  |  |  |  |  |
| Biao               | Xu              |  |  |  |  |  |  |

Supplemental Online Content: Nonauthor Collaborators

\*Indicates required information. Only first name, last name, and suffix will appear in PubMed.

|           |        |  |  |  |  |  |  |
|-----------|--------|--|--|--|--|--|--|
| Ruihong   | Wang   |  |  |  |  |  |  |
| Xiang     | Gu     |  |  |  |  |  |  |
| Min       | Wang   |  |  |  |  |  |  |
| Zhuhua    | Yao    |  |  |  |  |  |  |
| Ying      | Chen   |  |  |  |  |  |  |
| Peizhi    | Miao   |  |  |  |  |  |  |
| Zhenfei   | Chen   |  |  |  |  |  |  |
| Hui       | Li     |  |  |  |  |  |  |
| Dongyan   | Huang  |  |  |  |  |  |  |
| Qing      | Yang   |  |  |  |  |  |  |
| Xuefang   | Yu     |  |  |  |  |  |  |
| Aidong    | Shen   |  |  |  |  |  |  |
| Xin       | Zhang  |  |  |  |  |  |  |
| Xiaohui   | Liu    |  |  |  |  |  |  |
| Qiang     | Lv     |  |  |  |  |  |  |
| Yugang    | Dong   |  |  |  |  |  |  |
| Dan       | Liu    |  |  |  |  |  |  |
| Jingfeng  | Wang   |  |  |  |  |  |  |
| Huijun    | Ouyang |  |  |  |  |  |  |
| Chengchun | Tang   |  |  |  |  |  |  |
| Yong      | Chen   |  |  |  |  |  |  |
| Hui       | Gong   |  |  |  |  |  |  |
| Dandan    | Teng   |  |  |  |  |  |  |
| Jing      | Yan    |  |  |  |  |  |  |
| Linying   | Xu     |  |  |  |  |  |  |
| Weihong   | Jiang  |  |  |  |  |  |  |
| Xiaowei   | Zhou   |  |  |  |  |  |  |
| Guosheng  | Fu     |  |  |  |  |  |  |
| Ying      | Zheng  |  |  |  |  |  |  |
| Shuyang   | Zhang  |  |  |  |  |  |  |
| Lihong    | Xu     |  |  |  |  |  |  |
| Zhenyu    | Yang   |  |  |  |  |  |  |
| Chenying  | Wu     |  |  |  |  |  |  |
| Xiumin    | Han    |  |  |  |  |  |  |

Supplemental Online Content: Nonauthor Collaborators

\*Indicates required information. Only first name, last name, and suffix will appear in PubMed.

|           |       |  |  |  |  |  |  |
|-----------|-------|--|--|--|--|--|--|
| Yuxia     | Wang  |  |  |  |  |  |  |
| Jing      | Yu    |  |  |  |  |  |  |
| Qiongying | Wang  |  |  |  |  |  |  |
| Lihong    | Wang  |  |  |  |  |  |  |
| Lili      | Zheng |  |  |  |  |  |  |
| Wei       | Jin   |  |  |  |  |  |  |
| Nan       | Zhang |  |  |  |  |  |  |
| Chuanhuan | Zhang |  |  |  |  |  |  |
| Xiaojian  | Sun   |  |  |  |  |  |  |
| Yali      | Yao   |  |  |  |  |  |  |
| Peng      | Lei   |  |  |  |  |  |  |
| Zhaofen   | Zheng |  |  |  |  |  |  |
| Junkui    | Wang  |  |  |  |  |  |  |
| Fengling  | Ma    |  |  |  |  |  |  |
| Mingzhi   | Long  |  |  |  |  |  |  |
| Sulan     | Wang  |  |  |  |  |  |  |
| Hong      | Zhang |  |  |  |  |  |  |
| Mingmei   | Guo   |  |  |  |  |  |  |
| Manhua    | Chen  |  |  |  |  |  |  |
| Yayun     | Wang  |  |  |  |  |  |  |
| Zhanquan  | Li    |  |  |  |  |  |  |
| Ruili     | Duan  |  |  |  |  |  |  |
| Zuyi      | Yuan  |  |  |  |  |  |  |
| Tiaotiao  | Li    |  |  |  |  |  |  |
| Yibin     | Mei   |  |  |  |  |  |  |
| Linyan    | Ye    |  |  |  |  |  |  |
| Zhouqing  | Huang |  |  |  |  |  |  |
| Xingyuan  | Zhang |  |  |  |  |  |  |
| Wenling   | Liu   |  |  |  |  |  |  |
| Lei       | Li    |  |  |  |  |  |  |
| Ruiping   | Zhao  |  |  |  |  |  |  |
| Jie       | Gong  |  |  |  |  |  |  |
| Dongqing  | Zhang |  |  |  |  |  |  |
| Jiahui    | Zhu   |  |  |  |  |  |  |

Supplemental Online Content: Nonauthor Collaborators

\*Indicates required information. Only first name, last name, and suffix will appear in PubMed.

|                  |                 |  |  |  |  |  |  |
|------------------|-----------------|--|--|--|--|--|--|
| Chengjian        | Yang            |  |  |  |  |  |  |
| Chunxia          | Wang            |  |  |  |  |  |  |
| Zheng            | Ji              |  |  |  |  |  |  |
| Gao              | Xinpei          |  |  |  |  |  |  |
| Xia              | Mei             |  |  |  |  |  |  |
| Mingyun          | Liu             |  |  |  |  |  |  |
| Xin              | Zhang           |  |  |  |  |  |  |
| Clara            | Saldarriaga     |  |  |  |  |  |  |
| Paula            | Garcia Amaya    |  |  |  |  |  |  |
| Wilder Castano   | Osorio          |  |  |  |  |  |  |
| Maria            | Dussan          |  |  |  |  |  |  |
| Franklin Roberto | Quiroz Diaz     |  |  |  |  |  |  |
| Yuleth           | Prada           |  |  |  |  |  |  |
| Carlos Francisco | Jaramillo Munoz |  |  |  |  |  |  |
| Ana              | Zapata          |  |  |  |  |  |  |
| Monica           | Jaramillo       |  |  |  |  |  |  |
| Solmara          | Bello           |  |  |  |  |  |  |
| Rodrigo          | Botero          |  |  |  |  |  |  |
| Sandra           | Salazar         |  |  |  |  |  |  |
| Monica           | Lopez Pareja    |  |  |  |  |  |  |
| Claudia          | Mora            |  |  |  |  |  |  |
| Nicolas Ignacio  | Jaramillo Gomez |  |  |  |  |  |  |
| Juan Camilo      | Garcia          |  |  |  |  |  |  |
| Fabian           | Torres          |  |  |  |  |  |  |
| Miguel Alfredo   | Moncada         |  |  |  |  |  |  |
| Laura            | Velez Gil       |  |  |  |  |  |  |
| Jaime            | Andres Torres   |  |  |  |  |  |  |
| Yolanda          | Lievano         |  |  |  |  |  |  |
| Vojtech          | Melenovsky      |  |  |  |  |  |  |
| Miroslava        | Krausova        |  |  |  |  |  |  |
| Jan              | Malik           |  |  |  |  |  |  |
| Martin           | Hajsl           |  |  |  |  |  |  |
| Katerina         | Mala            |  |  |  |  |  |  |
| Jan F.           | Vojacek         |  |  |  |  |  |  |



Supplemental Online Content: Nonauthor Collaborators

\*Indicates required information. Only first name, last name, and suffix will appear in PubMed.

|           |                   |  |  |  |  |  |  |
|-----------|-------------------|--|--|--|--|--|--|
| Jana      | Fridrichova       |  |  |  |  |  |  |
| Filip     | Malek             |  |  |  |  |  |  |
| Dana      | Rihova            |  |  |  |  |  |  |
| Vladimir  | Cech              |  |  |  |  |  |  |
| Lenka     | Masarikova        |  |  |  |  |  |  |
| Vilma     | Machova           |  |  |  |  |  |  |
| Jindrich  | Spinar            |  |  |  |  |  |  |
| Jan       | Macha             |  |  |  |  |  |  |
| Libor     | Nechvatal         |  |  |  |  |  |  |
| Kenneth   | Egstrup           |  |  |  |  |  |  |
| Lene      | Moltrup           |  |  |  |  |  |  |
| Benedikte | Haastrup          |  |  |  |  |  |  |
| Camilla   | Jespersen         |  |  |  |  |  |  |
| Ole       | Nyvad             |  |  |  |  |  |  |
| Lene      | Tanggaard         |  |  |  |  |  |  |
| Lars      | Fog               |  |  |  |  |  |  |
| Pauline   | Johansen          |  |  |  |  |  |  |
| Henrik    | Wiggers           |  |  |  |  |  |  |
| Kristine  | Serup-Hansen      |  |  |  |  |  |  |
| Jens      | Due Lomholdt      |  |  |  |  |  |  |
| Kari      | Niemann           |  |  |  |  |  |  |
| Olav      | Wendelboe Nielsen |  |  |  |  |  |  |
| Elisa     | Stokholm          |  |  |  |  |  |  |
| Mustafa   | Taskiran          |  |  |  |  |  |  |
| Lotte     | Ring Pedersen     |  |  |  |  |  |  |
| Kai       | Nyman             |  |  |  |  |  |  |
| Tiina     | Sankari           |  |  |  |  |  |  |
| Heikki    | Ukkonen           |  |  |  |  |  |  |
| Tuija     | Vasankari         |  |  |  |  |  |  |
| Johan     | Lassus            |  |  |  |  |  |  |
| Sari      | Karesvuori        |  |  |  |  |  |  |
| Alain     | Cohen-Solal       |  |  |  |  |  |  |
| Miguel    | Vazquez Ibarra    |  |  |  |  |  |  |
| Karim     | Gallouj           |  |  |  |  |  |  |

Supplemental Online Content: Nonauthor Collaborators

\*Indicates required information. Only first name, last name, and suffix will appear in PubMed.

|                |            |  |  |  |  |  |  |
|----------------|------------|--|--|--|--|--|--|
| Angelique      | Lombart    |  |  |  |  |  |  |
| Thibaud        | Damy       |  |  |  |  |  |  |
| Mounira        | Karhoubi   |  |  |  |  |  |  |
| Michel         | Galinier   |  |  |  |  |  |  |
| Nathalie       | Rosoli     |  |  |  |  |  |  |
| Guillaume      | Taldir     |  |  |  |  |  |  |
| Maele          | Vomscheid  |  |  |  |  |  |  |
| Jean-Michel    | Tartiere   |  |  |  |  |  |  |
| Charline       | Genin      |  |  |  |  |  |  |
| Muriel         | Salvat     |  |  |  |  |  |  |
| Delphine       | Pollet     |  |  |  |  |  |  |
| Bernard        | Citron     |  |  |  |  |  |  |
| Ouarda         | Lamalle    |  |  |  |  |  |  |
| Nicolas        | Girerd     |  |  |  |  |  |  |
| Lydie          | Poinsignon |  |  |  |  |  |  |
| Francois       | Jourda     |  |  |  |  |  |  |
| Emmanuelle     | Mougenot   |  |  |  |  |  |  |
| Hatem          | Boughanmi  |  |  |  |  |  |  |
| Hanane         | Fodil      |  |  |  |  |  |  |
| Lionel         | Benhamou   |  |  |  |  |  |  |
| Ghania         | Harzi      |  |  |  |  |  |  |
| Stefan         | Störk      |  |  |  |  |  |  |
| Anja           | Knoppe     |  |  |  |  |  |  |
| Karl-Friedrich | Appel      |  |  |  |  |  |  |
| Petra          | Becker     |  |  |  |  |  |  |
| Johann         | Bauersachs |  |  |  |  |  |  |
| Manuela        | Geyer      |  |  |  |  |  |  |
| Ekkehard       | Schmidt    |  |  |  |  |  |  |
| Kristina       | Schmidt    |  |  |  |  |  |  |
| Frank          | Edelmann   |  |  |  |  |  |  |
| Sophia         | Stempel    |  |  |  |  |  |  |
| Daniel         | Beug       |  |  |  |  |  |  |
| Michael        | Bruder     |  |  |  |  |  |  |
| Michael        | Jeserich   |  |  |  |  |  |  |

Supplemental Online Content: Nonauthor Collaborators

\*Indicates required information. Only first name, last name, and suffix will appear in PubMed.

|            |                 |  |  |  |  |  |  |
|------------|-----------------|--|--|--|--|--|--|
| Mariana    | Rupprecht       |  |  |  |  |  |  |
| Hendrik    | Haake           |  |  |  |  |  |  |
| Bianca     | Krug-Hoeren     |  |  |  |  |  |  |
| Andreas    | Hagenow         |  |  |  |  |  |  |
| Anja       | Kuntzsch        |  |  |  |  |  |  |
| Mirjana    | Vojvodic-Mayer  |  |  |  |  |  |  |
| Ronny      | Lux             |  |  |  |  |  |  |
| Thomas     | Horacek         |  |  |  |  |  |  |
| Manuela    | Pluemer-Schmidt |  |  |  |  |  |  |
| Markus     | Knapp           |  |  |  |  |  |  |
| Edith      | Suepple-Poch    |  |  |  |  |  |  |
| Veselin    | Mitrovic        |  |  |  |  |  |  |
| Annerose   | Peil            |  |  |  |  |  |  |
| Stephan    | Rosenkranz      |  |  |  |  |  |  |
| Susanne    | Roelle-Hoehne   |  |  |  |  |  |  |
| Raffi      | Bekeredjian     |  |  |  |  |  |  |
| Ina        | Probst          |  |  |  |  |  |  |
| Izabela    | Tuleta          |  |  |  |  |  |  |
| Marjo      | Lauterborn      |  |  |  |  |  |  |
| Bernhard   | Winkelmann      |  |  |  |  |  |  |
| Linda      | Tenbusch        |  |  |  |  |  |  |
| Wolfgang   | Zeh             |  |  |  |  |  |  |
| Sandra     | Eble            |  |  |  |  |  |  |
| Mirjam     | Kessler         |  |  |  |  |  |  |
| Uta        | Dichristin      |  |  |  |  |  |  |
| Lars       | Maier           |  |  |  |  |  |  |
| Esther     | Kellner         |  |  |  |  |  |  |
| Dimitrios  | Tziakas         |  |  |  |  |  |  |
| Georgios   | Chalikias       |  |  |  |  |  |  |
| Filippos   | Triposkiadis    |  |  |  |  |  |  |
| Michalis   | Papamichalis    |  |  |  |  |  |  |
| John       | Parissis        |  |  |  |  |  |  |
| Vasiliki   | Bistola         |  |  |  |  |  |  |
| Haralampos | Karvounis       |  |  |  |  |  |  |

Supplemental Online Content: Nonauthor Collaborators

\*Indicates required information. Only first name, last name, and suffix will appear in PubMed.

|                      |                       |  |  |  |  |  |
|----------------------|-----------------------|--|--|--|--|--|
| Georgios             | Giannakoulas          |  |  |  |  |  |
| Dimitrios            | Tousoulis             |  |  |  |  |  |
| Christina            | Chrysohoou            |  |  |  |  |  |
| Katerina             | Naka                  |  |  |  |  |  |
| Anna                 | Kotsia                |  |  |  |  |  |
| Pablo Carlos         | Montenegro Valdovinos |  |  |  |  |  |
| Mayra                | Aguilar               |  |  |  |  |  |
| Ronaldo A.           | Gonzalez Orellana     |  |  |  |  |  |
| Ester                | MeléndeZ              |  |  |  |  |  |
| Juan Luis Arango     | Benecke               |  |  |  |  |  |
| Lisette              | Garcia de Krumbach    |  |  |  |  |  |
| Edgar Rolando        | Rodríguez             |  |  |  |  |  |
| Karla                | Barrera               |  |  |  |  |  |
| Mynor Adolfo Aguilar | Vásquez               |  |  |  |  |  |
| Chung Wah David      | Siu                   |  |  |  |  |  |
| Venus                | San Lui Ho            |  |  |  |  |  |
| Pui-Wai Alex         | Lee                   |  |  |  |  |  |
| Xue Ting             | Wang                  |  |  |  |  |  |
| Katherine            | Fan                   |  |  |  |  |  |
| Eva                  | Tam                   |  |  |  |  |  |
| Ebrahim              | Noori                 |  |  |  |  |  |
| Gyongyver            | Ibolya Mihaly         |  |  |  |  |  |
| Akos                 | Kalina                |  |  |  |  |  |
| Anita                | Szabo                 |  |  |  |  |  |
| Sandor               | Kancz                 |  |  |  |  |  |
| Istvanne             | Hentzel               |  |  |  |  |  |
| Ferenc               | Lakatos               |  |  |  |  |  |
| Krisztina            | Toth                  |  |  |  |  |  |
| Bela                 | Merkely               |  |  |  |  |  |
| Laura                | Dzsida                |  |  |  |  |  |
| Attila               | Palinkas              |  |  |  |  |  |
| Szilvia              | Rostasne Toth         |  |  |  |  |  |
| Marianna             | Svab                  |  |  |  |  |  |
| Balazs               | Bugarin-Horvath       |  |  |  |  |  |

Supplemental Online Content: Nonauthor Collaborators

\*Indicates required information. Only first name, last name, and suffix will appear in PubMed.

|           |               |  |  |  |  |  |  |
|-----------|---------------|--|--|--|--|--|--|
| Robert J. | Kirschner     |  |  |  |  |  |  |
| Rozsa     | Toth Karolyne |  |  |  |  |  |  |
| Kenneth   | McDonald      |  |  |  |  |  |  |
| Joanne    | Maher         |  |  |  |  |  |  |
| Ross      | Murphy        |  |  |  |  |  |  |
| Mary      | Hall          |  |  |  |  |  |  |
| Niall     | Mahon         |  |  |  |  |  |  |
| Elaine    | Gilroy        |  |  |  |  |  |  |
| Brendan   | McAdam        |  |  |  |  |  |  |
| David     | Farrell       |  |  |  |  |  |  |
| James     | ONeill        |  |  |  |  |  |  |
| Ciara     | Blaine        |  |  |  |  |  |  |
| Shaul     | Atar          |  |  |  |  |  |  |
| Rita      | Nadaf         |  |  |  |  |  |  |
| Tony      | Hayek         |  |  |  |  |  |  |
| Mira      | Hassan        |  |  |  |  |  |  |
| Basil S.  | Lewis         |  |  |  |  |  |  |
| Lena      | Zarachovsky   |  |  |  |  |  |  |
| Michael   | Shochat       |  |  |  |  |  |  |
| Ilana     | Aloni         |  |  |  |  |  |  |
| Abid      | Assali        |  |  |  |  |  |  |
| Elena     | Tsirulnikov   |  |  |  |  |  |  |
| Wadi      | Kinany        |  |  |  |  |  |  |
| Janna     | Etkin         |  |  |  |  |  |  |
| Tuvia     | Ben Gal       |  |  |  |  |  |  |
| Hadas     | Even Nir      |  |  |  |  |  |  |
| Yaron     | Arbel         |  |  |  |  |  |  |
| Adi       | Katalan Shani |  |  |  |  |  |  |
| Elias     | Mazen         |  |  |  |  |  |  |
| Gilat Ron | Avraham       |  |  |  |  |  |  |
| Sorel     | Goland        |  |  |  |  |  |  |
| Anastasia | Suzdalnizki   |  |  |  |  |  |  |
| Majdi     | Halabi        |  |  |  |  |  |  |
| Ilana     | Portnov       |  |  |  |  |  |  |

Supplemental Online Content: Nonauthor Collaborators

\*Indicates required information. Only first name, last name, and suffix will appear in PubMed.

|              |             |  |  |  |  |  |  |
|--------------|-------------|--|--|--|--|--|--|
| Tal          | Hasin       |  |  |  |  |  |  |
| Astrid       | Rojansky    |  |  |  |  |  |  |
| Rafat        | Jabara      |  |  |  |  |  |  |
| Galina       | Levin       |  |  |  |  |  |  |
| Amos         | Katz        |  |  |  |  |  |  |
| Orna         | Tubul       |  |  |  |  |  |  |
| Gil          | Moravsky    |  |  |  |  |  |  |
| Ira          | Lapidus     |  |  |  |  |  |  |
| Michele      | Senni       |  |  |  |  |  |  |
| Marilisa     | Ambrosio    |  |  |  |  |  |  |
| Claudio      | Passino     |  |  |  |  |  |  |
| Alessandra   | Gabutti     |  |  |  |  |  |  |
| Laura        | Scelsi      |  |  |  |  |  |  |
| Eleonora     | Vullo       |  |  |  |  |  |  |
| Paolo        | Midi        |  |  |  |  |  |  |
| Anna         | Felici      |  |  |  |  |  |  |
| Alessandro   | Fucili      |  |  |  |  |  |  |
| Maria        | Sarcone     |  |  |  |  |  |  |
| Savina       | Nodari      |  |  |  |  |  |  |
| Laura        | Lupi        |  |  |  |  |  |  |
| Vitaliano    | Spagnuolo   |  |  |  |  |  |  |
| Maurizio     | Volterrani  |  |  |  |  |  |  |
| Valentina    | Morsella    |  |  |  |  |  |  |
| Simona       | Sarzi Braga |  |  |  |  |  |  |
| Raffaella    | Vaninetti   |  |  |  |  |  |  |
| Piergiuseppe | Agostoni    |  |  |  |  |  |  |
| Elisabetta   | Salvioni    |  |  |  |  |  |  |
| Stefano      | Taddei      |  |  |  |  |  |  |
| Rosa Maria   | Bruno       |  |  |  |  |  |  |
| Gianfranco   | Parati      |  |  |  |  |  |  |
| Carlotta     | Munforti    |  |  |  |  |  |  |
| Rosanna      | Lauciello   |  |  |  |  |  |  |
| Stefano      | Coiro       |  |  |  |  |  |  |
| Andrea       | Mortara     |  |  |  |  |  |  |

Supplemental Online Content: Nonauthor Collaborators

\*Indicates required information. Only first name, last name, and suffix will appear in PubMed.

|            |            |  |  |  |  |  |  |
|------------|------------|--|--|--|--|--|--|
| Simone     | Mazzetti   |  |  |  |  |  |  |
| Gianfranco | Sinagra    |  |  |  |  |  |  |
| Federica   | Ramani     |  |  |  |  |  |  |
| Alessandra | Gualco     |  |  |  |  |  |  |
| Simona     | Cattaneo   |  |  |  |  |  |  |
| Giuseppe   | Argiolas   |  |  |  |  |  |  |
| Wanda      | Masala     |  |  |  |  |  |  |
| Franco     | Cosmi      |  |  |  |  |  |  |
| Beatrice   | Mariottoni |  |  |  |  |  |  |
| Akihiro    | Nakamura   |  |  |  |  |  |  |
| Kazumi     | Futono     |  |  |  |  |  |  |
| Tatsuya    | Komaru     |  |  |  |  |  |  |
| Tomoko     | Endo       |  |  |  |  |  |  |
| Shigeru    | Fukuzawa   |  |  |  |  |  |  |
| Yumi       | Nakamura   |  |  |  |  |  |  |
| Yasuo      | Okumura    |  |  |  |  |  |  |
| Haruka     | Sato       |  |  |  |  |  |  |
| Hirotsugu  | Tabata     |  |  |  |  |  |  |
| Mizuki     | Saino      |  |  |  |  |  |  |
| Takanori   | Ikeda      |  |  |  |  |  |  |
| Reiko      | Kaminishi  |  |  |  |  |  |  |
| Mio        | Ebato      |  |  |  |  |  |  |
| Akiko      | Fukatsu    |  |  |  |  |  |  |
| Takahiko   | Aoyama     |  |  |  |  |  |  |
| Chihiro    | Kitani     |  |  |  |  |  |  |
| Hiroki     | Sakamoto   |  |  |  |  |  |  |
| Kaori      | Amano      |  |  |  |  |  |  |
| Tomoaki    | Saeki      |  |  |  |  |  |  |
| Kayo       | Shimano    |  |  |  |  |  |  |
| Kenji      | Kada       |  |  |  |  |  |  |
| Yoko       | Tsuzuki    |  |  |  |  |  |  |
| Tetsuo     | Hashimoto  |  |  |  |  |  |  |
| Madoka     | Okamoto    |  |  |  |  |  |  |
| Kenshi     | Fujii      |  |  |  |  |  |  |

Supplemental Online Content: Nonauthor Collaborators

\*Indicates required information. Only first name, last name, and suffix will appear in PubMed.

|           |           |  |  |  |  |  |  |
|-----------|-----------|--|--|--|--|--|--|
| Mari      | Tsujimoto |  |  |  |  |  |  |
| Tahei     | Ichinohe  |  |  |  |  |  |  |
| Saori     | Okabe     |  |  |  |  |  |  |
| Keiji     | Hirooka   |  |  |  |  |  |  |
| Yuna      | Senshu    |  |  |  |  |  |  |
| Tetsuro   | Ohta      |  |  |  |  |  |  |
| Tomomi    | Hayashi   |  |  |  |  |  |  |
| Yusuke    | Kawai     |  |  |  |  |  |  |
| Juri      | Horio     |  |  |  |  |  |  |
| Atsushi   | Takaishi  |  |  |  |  |  |  |
| Mikiko    | Nakamura  |  |  |  |  |  |  |
| Hiroyuki  | Takatsu   |  |  |  |  |  |  |
| Tomoko    | Shiota    |  |  |  |  |  |  |
| Koji      | Maemura   |  |  |  |  |  |  |
| Momoyo    | Nishida   |  |  |  |  |  |  |
| Yoshisato | Shibata   |  |  |  |  |  |  |
| Kaori     | Nagashima |  |  |  |  |  |  |
| Taro      | Shibasaki |  |  |  |  |  |  |
| Nobue     | Takahashi |  |  |  |  |  |  |
| Harukazu  | Iseki     |  |  |  |  |  |  |
| Kenichi   | Otsuki    |  |  |  |  |  |  |
| Shunzo    | Matsuoka  |  |  |  |  |  |  |
| Kentaro   | Motoda    |  |  |  |  |  |  |
| Yoshiharu | Higuchi   |  |  |  |  |  |  |
| Hiromi    | Hayasaki  |  |  |  |  |  |  |
| Mamoru    | Manita    |  |  |  |  |  |  |
| Riyo      | Ito       |  |  |  |  |  |  |
| Masahiro  | Suzuki    |  |  |  |  |  |  |
| Kaori     | Fumikura  |  |  |  |  |  |  |
| Hiroshi   | Iwata     |  |  |  |  |  |  |
| Kaori     | Kinjo     |  |  |  |  |  |  |
| Eiki      | Takimoto  |  |  |  |  |  |  |
| Yuki      | Omori     |  |  |  |  |  |  |
| Kazuhiko  | Yumoto    |  |  |  |  |  |  |



Supplemental Online Content: Nonauthor Collaborators

\*Indicates required information. Only first name, last name, and suffix will appear in PubMed.

|           |            |  |  |  |  |  |  |
|-----------|------------|--|--|--|--|--|--|
| Jun       | Yoshizawa  |  |  |  |  |  |  |
| Chisato   | Izumi      |  |  |  |  |  |  |
| Kanae     | Hirase     |  |  |  |  |  |  |
| Shinichi  | Higashiue  |  |  |  |  |  |  |
| Ayaka     | Ishibaba   |  |  |  |  |  |  |
| Yorihiko  | Higashino  |  |  |  |  |  |  |
| Takuro    | Matsumura  |  |  |  |  |  |  |
| Hiroshi   | Iida       |  |  |  |  |  |  |
| Kaya      | Kowa       |  |  |  |  |  |  |
| Tokushi   | Koga       |  |  |  |  |  |  |
| Tomomi    | Hatakeda   |  |  |  |  |  |  |
| Nobuhiko  | Atsuchi    |  |  |  |  |  |  |
| Kana      | Migita     |  |  |  |  |  |  |
| Yukihiko  | Momiyama   |  |  |  |  |  |  |
| Yusuke    | Fukuda     |  |  |  |  |  |  |
| Masataka  | Fukue      |  |  |  |  |  |  |
| Kouji     | Uchida     |  |  |  |  |  |  |
| Katsumi   | Saito      |  |  |  |  |  |  |
| Sakiko    | Iida       |  |  |  |  |  |  |
| Seiji     | Fukamizu   |  |  |  |  |  |  |
| Junko     | Harada     |  |  |  |  |  |  |
| Yasuyoshi | Takei      |  |  |  |  |  |  |
| Saori     | Takano     |  |  |  |  |  |  |
| Yoshiki   | Hata       |  |  |  |  |  |  |
| Arisa     | Sato       |  |  |  |  |  |  |
| Yumi      | Shimura    |  |  |  |  |  |  |
| Shinko    | Hirata     |  |  |  |  |  |  |
| Atsuo     | Namiki     |  |  |  |  |  |  |
| Noriko    | Ishida     |  |  |  |  |  |  |
| Ichiro    | Michishita |  |  |  |  |  |  |
| Tomomi    | Ishimoto   |  |  |  |  |  |  |
| Kazuo     | Usuda      |  |  |  |  |  |  |
| Akiko     | Oomura     |  |  |  |  |  |  |
| Koichiro  | Kinugawa   |  |  |  |  |  |  |

Supplemental Online Content: Nonauthor Collaborators

\*Indicates required information. Only first name, last name, and suffix will appear in PubMed.

|           |           |  |  |  |  |  |  |
|-----------|-----------|--|--|--|--|--|--|
| Rumi      | Sasaki    |  |  |  |  |  |  |
| Takao     | Matsubara |  |  |  |  |  |  |
| Hiromi    | Kidani    |  |  |  |  |  |  |
| Yoshifumi | Awaji     |  |  |  |  |  |  |
| Yoko      | Kaneno    |  |  |  |  |  |  |
| Kentaro   | Yamashita |  |  |  |  |  |  |
| Masami    | Suzuki    |  |  |  |  |  |  |
| Hiroshi   | Fujita    |  |  |  |  |  |  |
| Aya       | Mashida   |  |  |  |  |  |  |
| Takahisa  | Yamada    |  |  |  |  |  |  |
| Shintaro  | Hirai     |  |  |  |  |  |  |
| Minoru    | Ichikawa  |  |  |  |  |  |  |
| Takae     | Muromaki  |  |  |  |  |  |  |
| Tomohito  | Ohtani    |  |  |  |  |  |  |
| Sachiyo   | Yamaguchi |  |  |  |  |  |  |
| Yutaka    | Furukawa  |  |  |  |  |  |  |
| Mika      | Takata    |  |  |  |  |  |  |
| Masato    | Baden     |  |  |  |  |  |  |
| Futoshi   | Kawasaki  |  |  |  |  |  |  |
| Hideki    | Tashiro   |  |  |  |  |  |  |
| Yuko      | Kita      |  |  |  |  |  |  |
| Mizuri    | Taki      |  |  |  |  |  |  |
| Kuniko    | Suzuki    |  |  |  |  |  |  |
| Kenji     | Nakama    |  |  |  |  |  |  |
| Chiaki    | Oota      |  |  |  |  |  |  |
| Kiyoshi   | Hibi      |  |  |  |  |  |  |
| Mizuho    | Shiono    |  |  |  |  |  |  |
| Satoaki   | Matoba    |  |  |  |  |  |  |
| Natsuki   | Kimura    |  |  |  |  |  |  |
| Akihiko   | Takahashi |  |  |  |  |  |  |
| Megumi    | Fujino    |  |  |  |  |  |  |
| Tomomi    | Ide       |  |  |  |  |  |  |
| Chiharu   | Tanaka    |  |  |  |  |  |  |
| Osamu     | Ueda      |  |  |  |  |  |  |

Supplemental Online Content: Nonauthor Collaborators

\*Indicates required information. Only first name, last name, and suffix will appear in PubMed.

|           |            |  |  |  |  |  |  |
|-----------|------------|--|--|--|--|--|--|
| Rieko     | Shimojima  |  |  |  |  |  |  |
| Takehiko  | Kuramochi  |  |  |  |  |  |  |
| Michiko   | Ando       |  |  |  |  |  |  |
| Haruhiko  | Onaka      |  |  |  |  |  |  |
| Anri      | Maeda      |  |  |  |  |  |  |
| Tetsuya   | Higami     |  |  |  |  |  |  |
| Ikumi     | Nishibe    |  |  |  |  |  |  |
| Mitsunori | Abe        |  |  |  |  |  |  |
| Megumi    | Matsugi    |  |  |  |  |  |  |
| Junya     | Ako        |  |  |  |  |  |  |
| Kimiko    | Yamamura   |  |  |  |  |  |  |
| Tomoya    | Ueda       |  |  |  |  |  |  |
| Yuki      | Itokazu    |  |  |  |  |  |  |
| Kotaro    | Sumii      |  |  |  |  |  |  |
| Kano      | Ichii      |  |  |  |  |  |  |
| Masatoshi | Shimizu    |  |  |  |  |  |  |
| Megumi    | Irikura    |  |  |  |  |  |  |
| Shigeo    | Shimizu    |  |  |  |  |  |  |
| Misa      | Ayabe      |  |  |  |  |  |  |
| Taku      | Matsubara  |  |  |  |  |  |  |
| Satoko    | Kaneko     |  |  |  |  |  |  |
| Tomomi    | Koizumi    |  |  |  |  |  |  |
| Keiko     | Watanabe   |  |  |  |  |  |  |
| Satoru    | Sakagami   |  |  |  |  |  |  |
| Mariko    | Kumaki     |  |  |  |  |  |  |
| Atsushi   | Suzuki     |  |  |  |  |  |  |
| Tomoe     | Kawano     |  |  |  |  |  |  |
| Yusuke    | Katayama   |  |  |  |  |  |  |
| Hiroko    | Nakamura   |  |  |  |  |  |  |
| Isao      | Taguchi    |  |  |  |  |  |  |
| Yuko      | Araki      |  |  |  |  |  |  |
| Nobuyoshi | Higa       |  |  |  |  |  |  |
| Yasuka    | Oshiro     |  |  |  |  |  |  |
| Kumiko    | Yahikozawa |  |  |  |  |  |  |

Supplemental Online Content: Nonauthor Collaborators

\*Indicates required information. Only first name, last name, and suffix will appear in PubMed.

|             |          |  |  |  |  |  |  |
|-------------|----------|--|--|--|--|--|--|
| Shiori      | Anzai    |  |  |  |  |  |  |
| Tatsuya     | Nunohiro |  |  |  |  |  |  |
| Daichi      | Nishi    |  |  |  |  |  |  |
| Shuichi     | Osaki    |  |  |  |  |  |  |
| Yoshiaki    | Tanaka   |  |  |  |  |  |  |
| Masayuki    | Kaneko   |  |  |  |  |  |  |
| Kimiko      | Noguchi  |  |  |  |  |  |  |
| Noriaki     | Watanabe |  |  |  |  |  |  |
| Toru        | Oishi    |  |  |  |  |  |  |
| Koichi      | Fuse     |  |  |  |  |  |  |
| Yukari      | Baba     |  |  |  |  |  |  |
| Myeong-Chan | Cho      |  |  |  |  |  |  |
| Ga-Eun      | Kim      |  |  |  |  |  |  |
| Jin-Ok      | Jeong    |  |  |  |  |  |  |
| Young-Eun   | Choi     |  |  |  |  |  |  |
| Hae-Young   | Lee      |  |  |  |  |  |  |
| Eunjin      | Hur      |  |  |  |  |  |  |
| Seok-Min    | Kang     |  |  |  |  |  |  |
| WonMi       | Lee      |  |  |  |  |  |  |
| Kye Hun     | Kim      |  |  |  |  |  |  |
| Jiyeon      | Song     |  |  |  |  |  |  |
| Byung-Su    | Yoo      |  |  |  |  |  |  |
| Seonmi      | Shin     |  |  |  |  |  |  |
| Mi Seung    | Shin     |  |  |  |  |  |  |
| Hei Won     | Oh       |  |  |  |  |  |  |
| Eung Ju     | Kim      |  |  |  |  |  |  |
| JinJu       | Park     |  |  |  |  |  |  |
| Dong-Ju     | Choi     |  |  |  |  |  |  |
| Eun Ji      | Yoon     |  |  |  |  |  |  |
| Dong Heon   | Yang     |  |  |  |  |  |  |
| JiHyeong    | Choi     |  |  |  |  |  |  |
| Jung-Hyun   | Choi     |  |  |  |  |  |  |
| Hwayoung    | Jeong    |  |  |  |  |  |  |
| Jin-Oh      | Choi     |  |  |  |  |  |  |

Supplemental Online Content: Nonauthor Collaborators

\*Indicates required information. Only first name, last name, and suffix will appear in PubMed.

|                   |                      |  |  |  |  |  |  |
|-------------------|----------------------|--|--|--|--|--|--|
| Seo Jin           | Hyun                 |  |  |  |  |  |  |
| Sang-Ho           | Jo                   |  |  |  |  |  |  |
| Lee               | Sujin                |  |  |  |  |  |  |
| Dong Kyu          | Jin                  |  |  |  |  |  |  |
| Jiwon             | Jeon                 |  |  |  |  |  |  |
| Joon-Han          | Shin                 |  |  |  |  |  |  |
| Ji Sung           | Na                   |  |  |  |  |  |  |
| Dong-Soo          | Kim                  |  |  |  |  |  |  |
| Eunryul           | Oh                   |  |  |  |  |  |  |
| Tiong Kiam        | Ong                  |  |  |  |  |  |  |
| Juriah            | Sulehan              |  |  |  |  |  |  |
| Hamat Hamdi       | Che Hassan           |  |  |  |  |  |  |
| Zati              | Amni Ismahadi        |  |  |  |  |  |  |
| Hafisyatul Aiza   | Zainal Abidin        |  |  |  |  |  |  |
| Nurhasanah Abdul  | Rahman               |  |  |  |  |  |  |
| Imran             | Zainal Abidin        |  |  |  |  |  |  |
| Manhaiyun         | Suhaimi              |  |  |  |  |  |  |
| Houng Bang        | Liew                 |  |  |  |  |  |  |
| Mabelle           | Wong                 |  |  |  |  |  |  |
| W. Yus Haniff W.  | Isa                  |  |  |  |  |  |  |
| Zalida            | Mamat                |  |  |  |  |  |  |
| Siti Khairani     | Zainal Abidin        |  |  |  |  |  |  |
| Kanaga            | Lakshimi Ravinttiran |  |  |  |  |  |  |
| Manuel Odin       | de Los Rios Ibarra   |  |  |  |  |  |  |
| Carlos Rodolfo    | Martinez Sanchez     |  |  |  |  |  |  |
| Diestefano        | Ronquillo Ramirez    |  |  |  |  |  |  |
| Abel              | Salazar Gaytan       |  |  |  |  |  |  |
| Carmen            | Gonzalez Sandoval    |  |  |  |  |  |  |
| Marco Antonio     | Alcocer Gamba        |  |  |  |  |  |  |
| Wendy             | Munoz Rosales        |  |  |  |  |  |  |
| Ramon Miguel      | Esturau Santalo      |  |  |  |  |  |  |
| Yazmin            | Sanchez Mendoza      |  |  |  |  |  |  |
| Gustavo Francisco | Mendez Machado       |  |  |  |  |  |  |
| Haydea            | Hirata Avila         |  |  |  |  |  |  |

Supplemental Online Content: Nonauthor Collaborators

\*Indicates required information. Only first name, last name, and suffix will appear in PubMed.

|                 |                           |  |  |  |  |  |
|-----------------|---------------------------|--|--|--|--|--|
| Raul            | Reyes Araiza              |  |  |  |  |  |
| Jaime           | Ruiz Morales              |  |  |  |  |  |
| Jorge Escobedo  | de la Pena                |  |  |  |  |  |
| Beatriz         | Villegas Lara             |  |  |  |  |  |
| Enrique         | Lopez Rosas               |  |  |  |  |  |
| Michelle        | Meza Hernandez            |  |  |  |  |  |
| Jaime           | Chavez Michel             |  |  |  |  |  |
| Elena           | Ruiz Rubio                |  |  |  |  |  |
| Alberto         | Varela                    |  |  |  |  |  |
| Arend           | Mosterd                   |  |  |  |  |  |
| Coriet          | Hobé-Rap                  |  |  |  |  |  |
| Dirk            | Lok                       |  |  |  |  |  |
| Rina            | Dommerholt                |  |  |  |  |  |
| Henk            | Swart                     |  |  |  |  |  |
| Catharina       | Terwisscha van Scheltinga |  |  |  |  |  |
| Ruud            | van de Wal                |  |  |  |  |  |
| Ilvy            | van Lieshout              |  |  |  |  |  |
| Peter           | Van der Meer              |  |  |  |  |  |
| Anja            | Branderhorst              |  |  |  |  |  |
| Henri Albert    | Werner                    |  |  |  |  |  |
| Ivonne          | van Ruijven-Mastenbroek   |  |  |  |  |  |
| Matthijs        | Matthijs                  |  |  |  |  |  |
| FL.             | Meijs                     |  |  |  |  |  |
| Linnea          | Oldenhof                  |  |  |  |  |  |
| Frank           | Den Hartog                |  |  |  |  |  |
| Margreeth       | Singerling                |  |  |  |  |  |
| Richard William | Troughton                 |  |  |  |  |  |
| Stephanie       | Rose                      |  |  |  |  |  |
| Fraser          | Hamilton                  |  |  |  |  |  |
| Sharon          | Jacques                   |  |  |  |  |  |
| Katherine       | Ferrier                   |  |  |  |  |  |
| Jo-Anne         | Kovacs                    |  |  |  |  |  |
| Mayanna         | Lund                      |  |  |  |  |  |
| Lynette         | Pearce                    |  |  |  |  |  |

Supplemental Online Content: Nonauthor Collaborators

\*Indicates required information. Only first name, last name, and suffix will appear in PubMed.

|                   |                    |  |  |  |  |  |  |
|-------------------|--------------------|--|--|--|--|--|--|
| Robert            | Doughty            |  |  |  |  |  |  |
| Mariska           | Terbals            |  |  |  |  |  |  |
| Nezar             | Amir               |  |  |  |  |  |  |
| Cathy             | Hulbert            |  |  |  |  |  |  |
| James             | Pemberton          |  |  |  |  |  |  |
| Deborah           | Scott              |  |  |  |  |  |  |
| Dennis            | Nilsen             |  |  |  |  |  |  |
| Jorunn            | Nilsen             |  |  |  |  |  |  |
| Lars              | Gullestad          |  |  |  |  |  |  |
| Elisabeth         | Bjorklund          |  |  |  |  |  |  |
| Dan               | Atar               |  |  |  |  |  |  |
| Hege              | Claussen           |  |  |  |  |  |  |
| Havard            | Keilegavlen        |  |  |  |  |  |  |
| Nina              | Faalun             |  |  |  |  |  |  |
| Vidar             | Ruddox             |  |  |  |  |  |  |
| Annboerg          | Pedersen           |  |  |  |  |  |  |
| Aldo Edwin German | Rodriguez Escudero |  |  |  |  |  |  |
| Sonia             | Romero             |  |  |  |  |  |  |
| Boris             | Orihuela           |  |  |  |  |  |  |
| Monica            | Del Portal         |  |  |  |  |  |  |
| Victor Elias      | Rodriguez          |  |  |  |  |  |  |
| Nurys             | Cabanillas Gallo   |  |  |  |  |  |  |
| Felix Alvaro      | Medina             |  |  |  |  |  |  |
| Jeanneth          | Rodriguez          |  |  |  |  |  |  |
| Libia Lu          | Galarreta          |  |  |  |  |  |  |
| Jill              | Espejo             |  |  |  |  |  |  |
| Armando Lionel    | Godoy Palomino     |  |  |  |  |  |  |
| Milagros          | Matta              |  |  |  |  |  |  |
| David Raymund K.  | Salvador           |  |  |  |  |  |  |
| Wendy Lynn        | Cudiamat           |  |  |  |  |  |  |
| Eugene            | Reyes              |  |  |  |  |  |  |
| Susan             | De Guzman          |  |  |  |  |  |  |
| Rody              | Sy                 |  |  |  |  |  |  |
| Claudette         | Silva              |  |  |  |  |  |  |

Supplemental Online Content: Nonauthor Collaborators

\*Indicates required information. Only first name, last name, and suffix will appear in PubMed.

|                    |                     |     |  |  |  |  |  |
|--------------------|---------------------|-----|--|--|--|--|--|
| Amelita            | Brillantes          |     |  |  |  |  |  |
| Amy                | Alon-Alon           |     |  |  |  |  |  |
| Gabriel            | Jocson              | 3rd |  |  |  |  |  |
| Frances Joyce      | Cortez              |     |  |  |  |  |  |
| Louie S.           | Tirador             |     |  |  |  |  |  |
| Charity Daine A.   | Gamboa              |     |  |  |  |  |  |
| Ramoncito S.       | Habaluyas           |     |  |  |  |  |  |
| Mary Jane          | Incognito           |     |  |  |  |  |  |
| Joanna             | Szachniewicz        |     |  |  |  |  |  |
| Sylwia             | Nawrocka-Millward   |     |  |  |  |  |  |
| Aleksander         | Goch                |     |  |  |  |  |  |
| Tomasz             | Lugowski            |     |  |  |  |  |  |
| Jadwiga            | Nessler             |     |  |  |  |  |  |
| Urszula            | Czubek              |     |  |  |  |  |  |
| Ewa                | Straburzynska Migaj |     |  |  |  |  |  |
| Agnieszka          | Przepiora           |     |  |  |  |  |  |
| Zbigniew           | Pijanowski          |     |  |  |  |  |  |
| Monika             | Pijanowska          |     |  |  |  |  |  |
| Jaroslaw           | Kasprzak            |     |  |  |  |  |  |
| Ewa                | Mirek-Bryniarska    |     |  |  |  |  |  |
| Wojciech           | Zareba              |     |  |  |  |  |  |
| Wlodzimierz        | Musial              |     |  |  |  |  |  |
| Agnieszka          | Tycinska            |     |  |  |  |  |  |
| Pawel              | Miekus              |     |  |  |  |  |  |
| Justyna            | Przydatek           |     |  |  |  |  |  |
| Waldemar           | Krysiak             |     |  |  |  |  |  |
| Edyta              | Skorek              |     |  |  |  |  |  |
| Przemyslaw         | Leszek              |     |  |  |  |  |  |
| Paula              | Polaska             |     |  |  |  |  |  |
| Grzegorz Krzysztof | Skonieczny          |     |  |  |  |  |  |
| Monika             | Roliard             |     |  |  |  |  |  |
| Marek              | Wujkowski           |     |  |  |  |  |  |
| Mariusz            | Strupiechowski      |     |  |  |  |  |  |
| Jose B.            | Vazquez-Tanus       |     |  |  |  |  |  |



Supplemental Online Content: Nonauthor Collaborators

\*Indicates required information. Only first name, last name, and suffix will appear in PubMed.

|           |                  |  |  |  |  |  |  |
|-----------|------------------|--|--|--|--|--|--|
| Maria     | Diago            |  |  |  |  |  |  |
| Julio     | Baez             |  |  |  |  |  |  |
| Lusdian   | Casanova-Jimenez |  |  |  |  |  |  |
| Carlos R. | Zayas-Torres     |  |  |  |  |  |  |
| Aleja     | Duran            |  |  |  |  |  |  |
| Pedro J.  | Colon-Hernandez  |  |  |  |  |  |  |
| Merari    | Carrasquillo     |  |  |  |  |  |  |
| Maria L.  | Rios Bonilla     |  |  |  |  |  |  |
| Magaly    | Marcano          |  |  |  |  |  |  |
| Pedro     | Garcia-Gordo     |  |  |  |  |  |  |
| Jessenia  | Navedo-Santos    |  |  |  |  |  |  |
| Svetlana  | Boldueva         |  |  |  |  |  |  |
| Natalia   | Shvets           |  |  |  |  |  |  |
| Natalia   | Orlova           |  |  |  |  |  |  |
| Maria     | Klepikova        |  |  |  |  |  |  |
| Alexander | Kastanayan       |  |  |  |  |  |  |
| Leily     | Babaeva          |  |  |  |  |  |  |
| Imad      | Meray            |  |  |  |  |  |  |
| Marina    | Teterina         |  |  |  |  |  |  |
| Yury      | Shvarts          |  |  |  |  |  |  |
| Larisa    | Konshina         |  |  |  |  |  |  |
| Sergey    | Yakushin         |  |  |  |  |  |  |
| Evgeniy   | Filippov         |  |  |  |  |  |  |
| Sergey    | Sayganov         |  |  |  |  |  |  |
| Dmitry    | Nikolaev         |  |  |  |  |  |  |
| Alexander | Vishnevskiy      |  |  |  |  |  |  |
| Vladislas | Zykov            |  |  |  |  |  |  |
| Oleg      | Solovev          |  |  |  |  |  |  |
| Dmitry    | Nazarov          |  |  |  |  |  |  |
| Olga      | Bolshakova       |  |  |  |  |  |  |
| Ekaterina | Polunicheva      |  |  |  |  |  |  |
| Tatiana   | Treshkur         |  |  |  |  |  |  |
| Edvard    | Bergardt         |  |  |  |  |  |  |
| Vladimir  | Nosov            |  |  |  |  |  |  |

Supplemental Online Content: Nonauthor Collaborators

\*Indicates required information. Only first name, last name, and suffix will appear in PubMed.

|                      |                  |  |  |  |  |  |  |
|----------------------|------------------|--|--|--|--|--|--|
| Lubov                | Koroleva         |  |  |  |  |  |  |
| Gadel                | Kamalov          |  |  |  |  |  |  |
| Liliya               | Urazaeva         |  |  |  |  |  |  |
| Yury                 | Lopatin          |  |  |  |  |  |  |
| Oleg                 | Ilyukhin         |  |  |  |  |  |  |
| Evgeny               | Morozov          |  |  |  |  |  |  |
| Kheng Leng David     | Sim              |  |  |  |  |  |  |
| Yuen Yet             | Lee              |  |  |  |  |  |  |
| Shao Guang Sheldon   | Lee              |  |  |  |  |  |  |
| Xuan                 | Tang             |  |  |  |  |  |  |
| Dinna Kar Nee        | Soon             |  |  |  |  |  |  |
| Boon Khim            | Lim              |  |  |  |  |  |  |
| Raymond CC.          | Wong             |  |  |  |  |  |  |
| Cher Yi              | Wong             |  |  |  |  |  |  |
| Seet Yoong           | Loh              |  |  |  |  |  |  |
| Geok Cheng Geraldine | Tan              |  |  |  |  |  |  |
| Mark Jonathan        | Abelson          |  |  |  |  |  |  |
| Annusca              | King             |  |  |  |  |  |  |
| Junaid               | Bayat            |  |  |  |  |  |  |
| Katija               | Badat            |  |  |  |  |  |  |
| Naresh               | Ranjith          |  |  |  |  |  |  |
| Shavina              | Ramdas           |  |  |  |  |  |  |
| Theema               | Nunkoo           |  |  |  |  |  |  |
| Hans Walter          | Prozesky         |  |  |  |  |  |  |
| Christina            | Naude            |  |  |  |  |  |  |
| Muhammed Ameen       | Fulat            |  |  |  |  |  |  |
| Michelle             | Pretorius        |  |  |  |  |  |  |
| Mpiko                | Ntsekhe          |  |  |  |  |  |  |
| Noloyiso             | Mtana            |  |  |  |  |  |  |
| Eric Q.              | Klug             |  |  |  |  |  |  |
| Vaman                | Naidoo           |  |  |  |  |  |  |
| Larisha              | Pillay-Ramaya    |  |  |  |  |  |  |
| Sharon               | Phillips         |  |  |  |  |  |  |
| Ellen                | Makoali Makotoko |  |  |  |  |  |  |

Supplemental Online Content: Nonauthor Collaborators

\*Indicates required information. Only first name, last name, and suffix will appear in PubMed.

|            |                   |  |  |  |  |  |  |
|------------|-------------------|--|--|--|--|--|--|
| Andonia    | Page              |  |  |  |  |  |  |
| Moelo      | Malahleha         |  |  |  |  |  |  |
| Mosidi     | Pitsoane          |  |  |  |  |  |  |
| Jose       | Lopez-Sendon      |  |  |  |  |  |  |
| Guiomar    | Mediavilla Garcia |  |  |  |  |  |  |
| Jose Ramon | Gonzalez Juanatey |  |  |  |  |  |  |
| Jose       | Seijas Amigo      |  |  |  |  |  |  |
| Manuel     | Martínez-Sellés   |  |  |  |  |  |  |
| Olga       | Sobrino González  |  |  |  |  |  |  |
| Eduardo    | González-Ferrer   |  |  |  |  |  |  |
| Paz        | González          |  |  |  |  |  |  |
| Nicolas    | Manito Lorite     |  |  |  |  |  |  |
| Sonia      | Guerrero          |  |  |  |  |  |  |
| Núria      | Farré López       |  |  |  |  |  |  |
| Cristina   | Soler Ayat        |  |  |  |  |  |  |
| Juan Jose  | Gomez Doblas      |  |  |  |  |  |  |
| María      | Robles            |  |  |  |  |  |  |
| Julio      | Núñez             |  |  |  |  |  |  |
| Anna       | Mollar Fernández  |  |  |  |  |  |  |
| Manuel     | Gómez Bueno       |  |  |  |  |  |  |
| Ariadna    | González Segovia  |  |  |  |  |  |  |
| Lars       | Lund              |  |  |  |  |  |  |
| Ann        | Hultman-Cadring   |  |  |  |  |  |  |
| Tymon      | Pol               |  |  |  |  |  |  |
| Annika     | Langoe            |  |  |  |  |  |  |
| Ole        | Hansen            |  |  |  |  |  |  |
| Else       | Nake              |  |  |  |  |  |  |
| Tamas      | Danyi             |  |  |  |  |  |  |
| Anna-Karin | Kruse             |  |  |  |  |  |  |
| Christer   | Magnusson         |  |  |  |  |  |  |
| Ninve      | Palo              |  |  |  |  |  |  |
| Michael    | Fu                |  |  |  |  |  |  |
| Kim        | Fahlen            |  |  |  |  |  |  |
| Entela     | Bollano           |  |  |  |  |  |  |

Supplemental Online Content: Nonauthor Collaborators

\*Indicates required information. Only first name, last name, and suffix will appear in PubMed.

|              |               |  |  |  |  |  |  |
|--------------|---------------|--|--|--|--|--|--|
| Ann-Christin | Westlund      |  |  |  |  |  |  |
| Roger        | Hullin        |  |  |  |  |  |  |
| Sandrine     | Salzmann      |  |  |  |  |  |  |
| Tiziano      | Mocchetti     |  |  |  |  |  |  |
| Anna         | Serra         |  |  |  |  |  |  |
| Christian    | Mueller       |  |  |  |  |  |  |
| Dayana       | Flores        |  |  |  |  |  |  |
| Chern-En     | Chiang        |  |  |  |  |  |  |
| I-Chen       | Lin           |  |  |  |  |  |  |
| Juey-Jen     | Hwang         |  |  |  |  |  |  |
| Yi-Chun      | Chen          |  |  |  |  |  |  |
| Wei-Ting     | Chang         |  |  |  |  |  |  |
| Shu-Fen      | Su            |  |  |  |  |  |  |
| Ting-Hsing   | Chao          |  |  |  |  |  |  |
| Wen-Hui      | Tseng         |  |  |  |  |  |  |
| Yen-Wen      | Wu            |  |  |  |  |  |  |
| Yung-Cheng   | Chen          |  |  |  |  |  |  |
| Ming-En      | Liu           |  |  |  |  |  |  |
| Vinny        | Chou          |  |  |  |  |  |  |
| Yuksel       | Cavusoglu     |  |  |  |  |  |  |
| Mehmet       | Birhan Yilmaz |  |  |  |  |  |  |
| Vedat        | Sansoy        |  |  |  |  |  |  |
| Tayfun       | Sahin         |  |  |  |  |  |  |
| Murat        | Sezer         |  |  |  |  |  |  |
| Ahmet        | Celik         |  |  |  |  |  |  |
| Mehmet Ali   | Oto           |  |  |  |  |  |  |
| Istemihan    | Tengiz        |  |  |  |  |  |  |
| Oksana       | Reshotko      |  |  |  |  |  |  |
| Oleksandra   | Donets        |  |  |  |  |  |  |
| Yuliia       | Rybachok      |  |  |  |  |  |  |
| Oleg         | Sychov        |  |  |  |  |  |  |
| Olena        | Romanova      |  |  |  |  |  |  |
| Oleksandr    | Kulbachuk     |  |  |  |  |  |  |
| Yuliia       | Klitsunova    |  |  |  |  |  |  |

Supplemental Online Content: Nonauthor Collaborators

\*Indicates required information. Only first name, last name, and suffix will appear in PubMed.

|             |          |  |  |  |  |  |  |
|-------------|----------|--|--|--|--|--|--|
| Natalia     | Velichko |  |  |  |  |  |  |
| Nataliia    | Tomakh   |  |  |  |  |  |  |
| Iain        | Squire   |  |  |  |  |  |  |
| Judith      | Fisher   |  |  |  |  |  |  |
| Hugh        | Bethell  |  |  |  |  |  |  |
| Emma        | Howard   |  |  |  |  |  |  |
| Craig Scott | Barr     |  |  |  |  |  |  |
| Julie       | Dean     |  |  |  |  |  |  |
| Andrew      | Clark    |  |  |  |  |  |  |
| Jeanne      | Bulemfu  |  |  |  |  |  |  |
| Justin      | Cooke    |  |  |  |  |  |  |
| Amanda      | Whileman |  |  |  |  |  |  |
| Ceri        | Davies   |  |  |  |  |  |  |
| Jane        | Pheby    |  |  |  |  |  |  |
| Theresa     | McDonagh |  |  |  |  |  |  |
| Jonathan    | Breeze   |  |  |  |  |  |  |
| Kenneth     | Wong     |  |  |  |  |  |  |
| Catherine   | Fleming  |  |  |  |  |  |  |
| Jay         | Amin     |  |  |  |  |  |  |
| Theresa     | Cervoni  |  |  |  |  |  |  |
| Shamaila    | Aslam    |  |  |  |  |  |  |
| Dawn        | Burns    |  |  |  |  |  |  |
| Alan J.     | Bank     |  |  |  |  |  |  |
| Nicole      | Gernes   |  |  |  |  |  |  |
| Noel W.     | Bedwell  |  |  |  |  |  |  |
| Mary        | Craig    |  |  |  |  |  |  |
| Bruce J.    | Iteld    |  |  |  |  |  |  |
| Brandy      | Ocman    |  |  |  |  |  |  |
| Rajinder    | Bhalla   |  |  |  |  |  |  |
| Teresa      | Hicks    |  |  |  |  |  |  |
| A. Alan     | Sp Chu   |  |  |  |  |  |  |
| Susan       | Nguyen   |  |  |  |  |  |  |
| James       | Feldman  |  |  |  |  |  |  |
| Madeline    | Peek     |  |  |  |  |  |  |

Supplemental Online Content: Nonauthor Collaborators

\*Indicates required information. Only first name, last name, and suffix will appear in PubMed.

|             |            |  |  |  |  |  |  |
|-------------|------------|--|--|--|--|--|--|
| Ferris      | George     |  |  |  |  |  |  |
| Christine   | Baker      |  |  |  |  |  |  |
| Wayne L.    | Gray       |  |  |  |  |  |  |
| Sherry      | Adair      |  |  |  |  |  |  |
| Preetham    | Jetty      |  |  |  |  |  |  |
| Alyssa      | Key        |  |  |  |  |  |  |
| Navid       | Kazemi     |  |  |  |  |  |  |
| Suzette     | Hollis     |  |  |  |  |  |  |
| Joshua      | Larned     |  |  |  |  |  |  |
| Mara-Li     | Ortiz      |  |  |  |  |  |  |
| Janet L.    | Smith      |  |  |  |  |  |  |
| Tina        | Abell      |  |  |  |  |  |  |
| Linda       | Cadaret    |  |  |  |  |  |  |
| Cynthia     | Larew      |  |  |  |  |  |  |
| Robert      | Long       |  |  |  |  |  |  |
| Theresa     | Hickey     |  |  |  |  |  |  |
| Sharan S.   | Mahal      |  |  |  |  |  |  |
| Sivaradhika | Yandamuri  |  |  |  |  |  |  |
| David J.    | Whellan    |  |  |  |  |  |  |
| Daniel      | Schwegler  |  |  |  |  |  |  |
| Peter       | McCullough |  |  |  |  |  |  |
| Rebecca     | Baker      |  |  |  |  |  |  |
| John        | McGinty    |  |  |  |  |  |  |
| Nancy       | Fry        |  |  |  |  |  |  |
| Jamie M.    | Pelzel     |  |  |  |  |  |  |
| Ashley      | Douvier    |  |  |  |  |  |  |
| Juan        | Vilaro     |  |  |  |  |  |  |
| Sarah       | Long       |  |  |  |  |  |  |
| Richard     | Perlman    |  |  |  |  |  |  |
| Donna       | Hoopes     |  |  |  |  |  |  |
| Ramana      | Podugu     |  |  |  |  |  |  |
| Kathleen    | Smith      |  |  |  |  |  |  |
| Peter       | Rahko      |  |  |  |  |  |  |
| Karen J.    | Olsen      |  |  |  |  |  |  |

Supplemental Online Content: Nonauthor Collaborators

\*Indicates required information. Only first name, last name, and suffix will appear in PubMed.

|                  |                   |  |  |  |  |  |  |
|------------------|-------------------|--|--|--|--|--|--|
| Ashwin           | Ravichandran      |  |  |  |  |  |  |
| Bonnita          | Reilly            |  |  |  |  |  |  |
| Renee            | Sangrigoli        |  |  |  |  |  |  |
| Linda            | Schwarz           |  |  |  |  |  |  |
| Trevor O.        | Greene            |  |  |  |  |  |  |
| Cathy            | Jackson           |  |  |  |  |  |  |
| Palak            | Shah              |  |  |  |  |  |  |
| Teleah           | Davis             |  |  |  |  |  |  |
| Dennis           | Spiller           |  |  |  |  |  |  |
| Smelda           | Ferrin            |  |  |  |  |  |  |
| Dilip B.         | Viswanath         |  |  |  |  |  |  |
| Sue              | Manga             |  |  |  |  |  |  |
| Zi Jian          | Xu                |  |  |  |  |  |  |
| Deborah          | Holmes-Rees       |  |  |  |  |  |  |
| Jon M.           | Bittrick          |  |  |  |  |  |  |
| Ericka           | Calhoun           |  |  |  |  |  |  |
| Gregory Alan     | Ewald             |  |  |  |  |  |  |
| Karen            | Bult              |  |  |  |  |  |  |
| Maryjane         | Farr              |  |  |  |  |  |  |
| Andrea           | Kim               |  |  |  |  |  |  |
| Les              | Forgosh           |  |  |  |  |  |  |
| Joyce            | Riestenberg-Smith |  |  |  |  |  |  |
| Naseem           | Jaffrani          |  |  |  |  |  |  |
| Rebecca          | Childers          |  |  |  |  |  |  |
| Douglas Marshall | Brinkley          |  |  |  |  |  |  |
| Amanda           | Carroll           |  |  |  |  |  |  |
| Dalton S.        | McLean            |  |  |  |  |  |  |
| Hugh             | Pruitt            |  |  |  |  |  |  |
| Greg             | Lewis             |  |  |  |  |  |  |
| Diane            | Cocca-Spofford    |  |  |  |  |  |  |
| Harvey A.        | Snyder            |  |  |  |  |  |  |
| Louise           | Pantuck           |  |  |  |  |  |  |
| Edward J.        | Teufel            |  |  |  |  |  |  |
| Brenda           | Glasgow           |  |  |  |  |  |  |

Supplemental Online Content: Nonauthor Collaborators

\*Indicates required information. Only first name, last name, and suffix will appear in PubMed.

|                 |                 |  |  |  |  |  |  |
|-----------------|-----------------|--|--|--|--|--|--|
| Daniel J.       | Donovan         |  |  |  |  |  |  |
| Maria Magdalena | Alvarado-Garcia |  |  |  |  |  |  |
| Ira             | Dauber          |  |  |  |  |  |  |
| Susan           | Derbyshire      |  |  |  |  |  |  |
| Suhail          | Zavaro          |  |  |  |  |  |  |
| Aolani          | Miller          |  |  |  |  |  |  |
| Kevin           | Sharkey         |  |  |  |  |  |  |
| Alanza          | Ferguson        |  |  |  |  |  |  |
| Kirkwood        | Adams           |  |  |  |  |  |  |
| Jana            | Glotzer         |  |  |  |  |  |  |
| Jose A.         | Perez           |  |  |  |  |  |  |
| Jodie           | Addington       |  |  |  |  |  |  |
| Zulfiquar       | Bhatti          |  |  |  |  |  |  |
| Mike B.         | Melucci         |  |  |  |  |  |  |
| Susan           | Meier           |  |  |  |  |  |  |
| Michael         | Huber           |  |  |  |  |  |  |
| Fujiko          | Anazawa         |  |  |  |  |  |  |
| Jenica          | Upshaw          |  |  |  |  |  |  |
| Katelyn         | Carr            |  |  |  |  |  |  |
| Mark Jeffrey    | Holmberg        |  |  |  |  |  |  |
| Lois S.         | Rasmussen       |  |  |  |  |  |  |
| Vanessa J.      | Lucarella       |  |  |  |  |  |  |
| Kathleen        | Maloney         |  |  |  |  |  |  |
| Kenneth C.      | Sabatino        |  |  |  |  |  |  |
| John            | Everett         |  |  |  |  |  |  |
| Emily           | Kelley          |  |  |  |  |  |  |
| Sandhya         | Murthy          |  |  |  |  |  |  |
| Angeline        | Camillo         |  |  |  |  |  |  |
| Nancy           | Sweitzer        |  |  |  |  |  |  |
| Cindy           | Schrag          |  |  |  |  |  |  |
| Peter E.        | Carson          |  |  |  |  |  |  |
| Jacqueline      | Gannuscio       |  |  |  |  |  |  |
| Neil            | Pendril Lewis   |  |  |  |  |  |  |
| Krista          | Chafin          |  |  |  |  |  |  |



Supplemental Online Content: Nonauthor Collaborators

\*Indicates required information. Only first name, last name, and suffix will appear in PubMed.

|            |                |  |  |  |  |  |  |
|------------|----------------|--|--|--|--|--|--|
| Alan Bruce | Miller         |  |  |  |  |  |  |
| Erin       | Richardson     |  |  |  |  |  |  |
| Usman      | Qayyum         |  |  |  |  |  |  |
| Paige      | Brown          |  |  |  |  |  |  |
| Dinesh     | Singal         |  |  |  |  |  |  |
| Danielle   | Giunta         |  |  |  |  |  |  |
| Arun       | Krishnamoorthy |  |  |  |  |  |  |
| Reema      | Vallabh        |  |  |  |  |  |  |
| Andrew J.  | Keller         |  |  |  |  |  |  |
| Stephanie  | Burton         |  |  |  |  |  |  |
| Alexander  | Adler          |  |  |  |  |  |  |
| Dean       | Thompson       |  |  |  |  |  |  |
| Josef      | Stehlik        |  |  |  |  |  |  |
| Jennifer   | Hong           |  |  |  |  |  |  |
| Gary J.    | Luckasen       |  |  |  |  |  |  |
| Scott      | Kaczkowski     |  |  |  |  |  |  |
| Wayne      | Old            |  |  |  |  |  |  |
| Melinda    | Bullivant      |  |  |  |  |  |  |
| John       | Boehmer        |  |  |  |  |  |  |
| Kevin      | Gardner        |  |  |  |  |  |  |
| Dinesh K.  | Gupta          |  |  |  |  |  |  |
| Tammy      | Davey          |  |  |  |  |  |  |
| Hirsch     | Mehta          |  |  |  |  |  |  |
| Gina       | Ciezkowski     |  |  |  |  |  |  |
| Michael    | Hong           |  |  |  |  |  |  |
| Elizabeth  | Hejna          |  |  |  |  |  |  |
| Ashrith    | Guha           |  |  |  |  |  |  |
| Marcos     | De Oliveira    |  |  |  |  |  |  |
| Tariq      | Haddad         |  |  |  |  |  |  |
| Deanna     | Overbeck       |  |  |  |  |  |  |
| Hamid      | Taheri         |  |  |  |  |  |  |
| Abbey      | Elie           |  |  |  |  |  |  |
| Ioana      | Dumitru        |  |  |  |  |  |  |
| Ricardo    | Guedes         |  |  |  |  |  |  |

Supplemental Online Content: Nonauthor Collaborators

\*Indicates required information. Only first name, last name, and suffix will appear in PubMed.

|              |            |  |  |  |  |  |  |
|--------------|------------|--|--|--|--|--|--|
| Alain        | Heroux     |  |  |  |  |  |  |
| Carol        | Kartje     |  |  |  |  |  |  |
| Marcel E.    | Zughaib    |  |  |  |  |  |  |
| Candice      | Edillo     |  |  |  |  |  |  |
| Chad         | Link       |  |  |  |  |  |  |
| Jennifer     | Boak       |  |  |  |  |  |  |
| Andrew       | Darlington |  |  |  |  |  |  |
| Kathryn      | Kaszycki   |  |  |  |  |  |  |
| Stephen B.   | Sloan      |  |  |  |  |  |  |
| Deborah      | Wood       |  |  |  |  |  |  |
| Mayar        | Jundi      |  |  |  |  |  |  |
| Ann          | Ostrander  |  |  |  |  |  |  |
| Sandeep      | Khosla     |  |  |  |  |  |  |
| Sudha        | Lukka      |  |  |  |  |  |  |
| Marcus L.    | Williams   |  |  |  |  |  |  |
| Kimberly     | Michel     |  |  |  |  |  |  |
| Andre        | Artis      |  |  |  |  |  |  |
| Kimberly     | Armstrong  |  |  |  |  |  |  |
| Nicholas     | Kondo      |  |  |  |  |  |  |
| Gretchen     | Kostedt    |  |  |  |  |  |  |
| Israel       | Galtes     |  |  |  |  |  |  |
| Yasnhai      | Diaz       |  |  |  |  |  |  |
| Luis         | Martinez   |  |  |  |  |  |  |
| Beatriz      | Penafiel   |  |  |  |  |  |  |
| Jose F.      | Cardona    |  |  |  |  |  |  |
| Abril        | Juarez     |  |  |  |  |  |  |
| Shuaib       | Abdullah   |  |  |  |  |  |  |
| Amy          | Atwell     |  |  |  |  |  |  |
| Albert       | Albert     |  |  |  |  |  |  |
| J            | Sharf      |  |  |  |  |  |  |
| Leonardo     | Cortes     |  |  |  |  |  |  |
| Ravi         | Bhagwat    |  |  |  |  |  |  |
| Donna        | Winterrowd |  |  |  |  |  |  |
| Elie Michael | Donath     |  |  |  |  |  |  |

Supplemental Online Content: Nonauthor Collaborators

\*Indicates required information. Only first name, last name, and suffix will appear in PubMed.

|            |                |  |  |  |  |  |  |
|------------|----------------|--|--|--|--|--|--|
| Maria      | Ycaza          |  |  |  |  |  |  |
| Alonzo     | Jones          |  |  |  |  |  |  |
| Carla      | Burton         |  |  |  |  |  |  |
| Eve        | Gillespie      |  |  |  |  |  |  |
| Pat        | Keane-Richmond |  |  |  |  |  |  |
| Richard    | Becker         |  |  |  |  |  |  |
| Rachel     | Mardis         |  |  |  |  |  |  |
| Peter S.   | Fail           |  |  |  |  |  |  |
| Vicky      | Parfait        |  |  |  |  |  |  |
| Siby       | Ayalloore      |  |  |  |  |  |  |
| Tessie     | Rideaux        |  |  |  |  |  |  |
| Wade       | May            |  |  |  |  |  |  |
| Julie      | Zannini        |  |  |  |  |  |  |
| Atul R.    | Chugh          |  |  |  |  |  |  |
| Stephanie  | Alford         |  |  |  |  |  |  |
| Mohsin     | Alhaddad       |  |  |  |  |  |  |
| Lani       | Holman         |  |  |  |  |  |  |
| Russell J. | Strader        |  |  |  |  |  |  |
| Alicia     | Gneiting       |  |  |  |  |  |  |
| Terry      | Wells          |  |  |  |  |  |  |
| Jessica    | Smith          |  |  |  |  |  |  |
| Vernon     | Young          |  |  |  |  |  |  |
| Cynthia    | Buchanan       |  |  |  |  |  |  |
| Ish K.     | Singla         |  |  |  |  |  |  |
| Justin     | Roth           |  |  |  |  |  |  |
| Henry      | Ooi            |  |  |  |  |  |  |
| Laura      | Diedrich       |  |  |  |  |  |  |
| Harry T.   | Colfer         |  |  |  |  |  |  |
| Denise     | Antonishen     |  |  |  |  |  |  |
| Michael    | Bauer          |  |  |  |  |  |  |
| Melissa    | Galindo        |  |  |  |  |  |  |
| Leslie W.  | Miller         |  |  |  |  |  |  |
| Delia      | Johnson        |  |  |  |  |  |  |
| Saul       | Schaefer       |  |  |  |  |  |  |

Supplemental Online Content: Nonauthor Collaborators

\*Indicates required information. Only first name, last name, and suffix will appear in PubMed.

|            |          |     |  |  |  |  |  |
|------------|----------|-----|--|--|--|--|--|
| Kevin      | Chun     |     |  |  |  |  |  |
| Denise     | Barnard  |     |  |  |  |  |  |
| Matt       | Kawahara |     |  |  |  |  |  |
| Brian A.   | Foley    |     |  |  |  |  |  |
| Sabrina    | Forbus   |     |  |  |  |  |  |
| Andrey     | Espinoza |     |  |  |  |  |  |
| Robin      | Enea     |     |  |  |  |  |  |
| Enrique    | Flores   |     |  |  |  |  |  |
| Lorie      | Benedict |     |  |  |  |  |  |
| Maria Rosa | Costanzo |     |  |  |  |  |  |
| Josilyn    | Klimek   |     |  |  |  |  |  |
| Dawn       | Lombardo |     |  |  |  |  |  |
| Wei        | Zhou     |     |  |  |  |  |  |
| Charles    | Treasure | 2nd |  |  |  |  |  |
| Doreen     | Nicely   |     |  |  |  |  |  |
| David      | Kraus    |     |  |  |  |  |  |
| Paula      | Higdon   |     |  |  |  |  |  |
| Van Q.     | Nguyen   |     |  |  |  |  |  |
| Shari      | Cook     |     |  |  |  |  |  |
